# Supplementary material
Source: Research Square preprint supplement (doi:10.21203/rs.3.rs-9205857/v1)
Supplement: Supplementary file 1 [file 8edb7a2721dc6c6883c28136.docx]

**Supporting Information for**

**A dipolar bidentate molecule for efficient and stable all-inorganic perovskite solar cells**

Cong Shen1,2, Tengling Ye1, Artem Kuklin1,3, Peixia Yang1, Hans Ågren1,3, Lijie Sun4, and Guanying Chen1,2,4*

1 MllT Key Laboratory of Critical Materials Technology for New Energy Conversion and Storage,School of Chemistry and Chemical Engineering, Harbin Institute of Technology, Harbin 150001, People’s Republic of China

2 Harbin KY Semiconductor, Inc., Harbin, 150028, People’s Republic of China

3 Department of Physics and Astronomy, Division of X-ray Photon Science, Uppsala University, Uppsala, SE-75121 Sweden

4 Shanghai Institute of Space Power-Sources,State Key Laboratory of Space Power-Sources, Shanghai 200245, China

***Correspondence:** chenguanying@hit.edu.cn


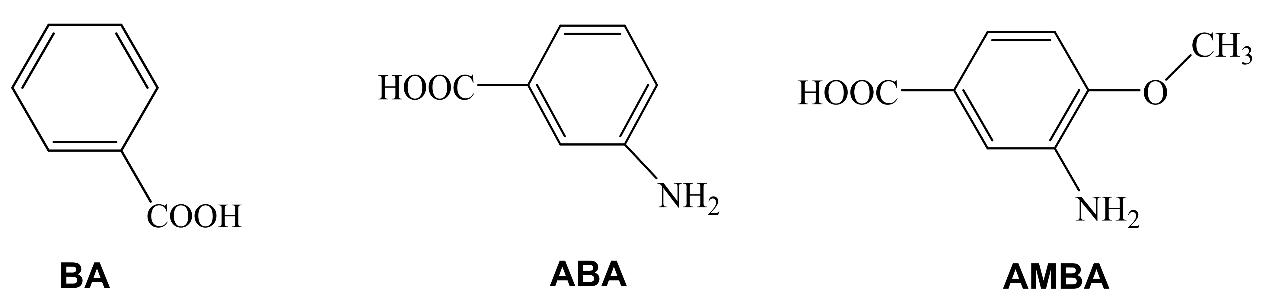


**Fig. S1** Molecular structures of BA, ABA, and AMBA.


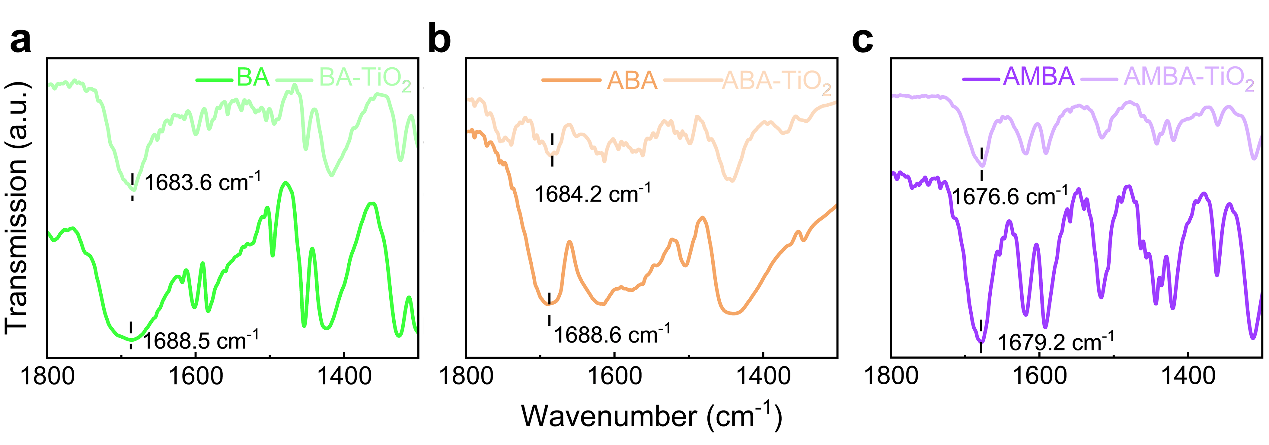


**Fig. S2** FTIR spectra of (a) BA, BA-TiO2, (b) ABA, ABA-TiO2, (c) AMBA, and AMBA-TiO2.


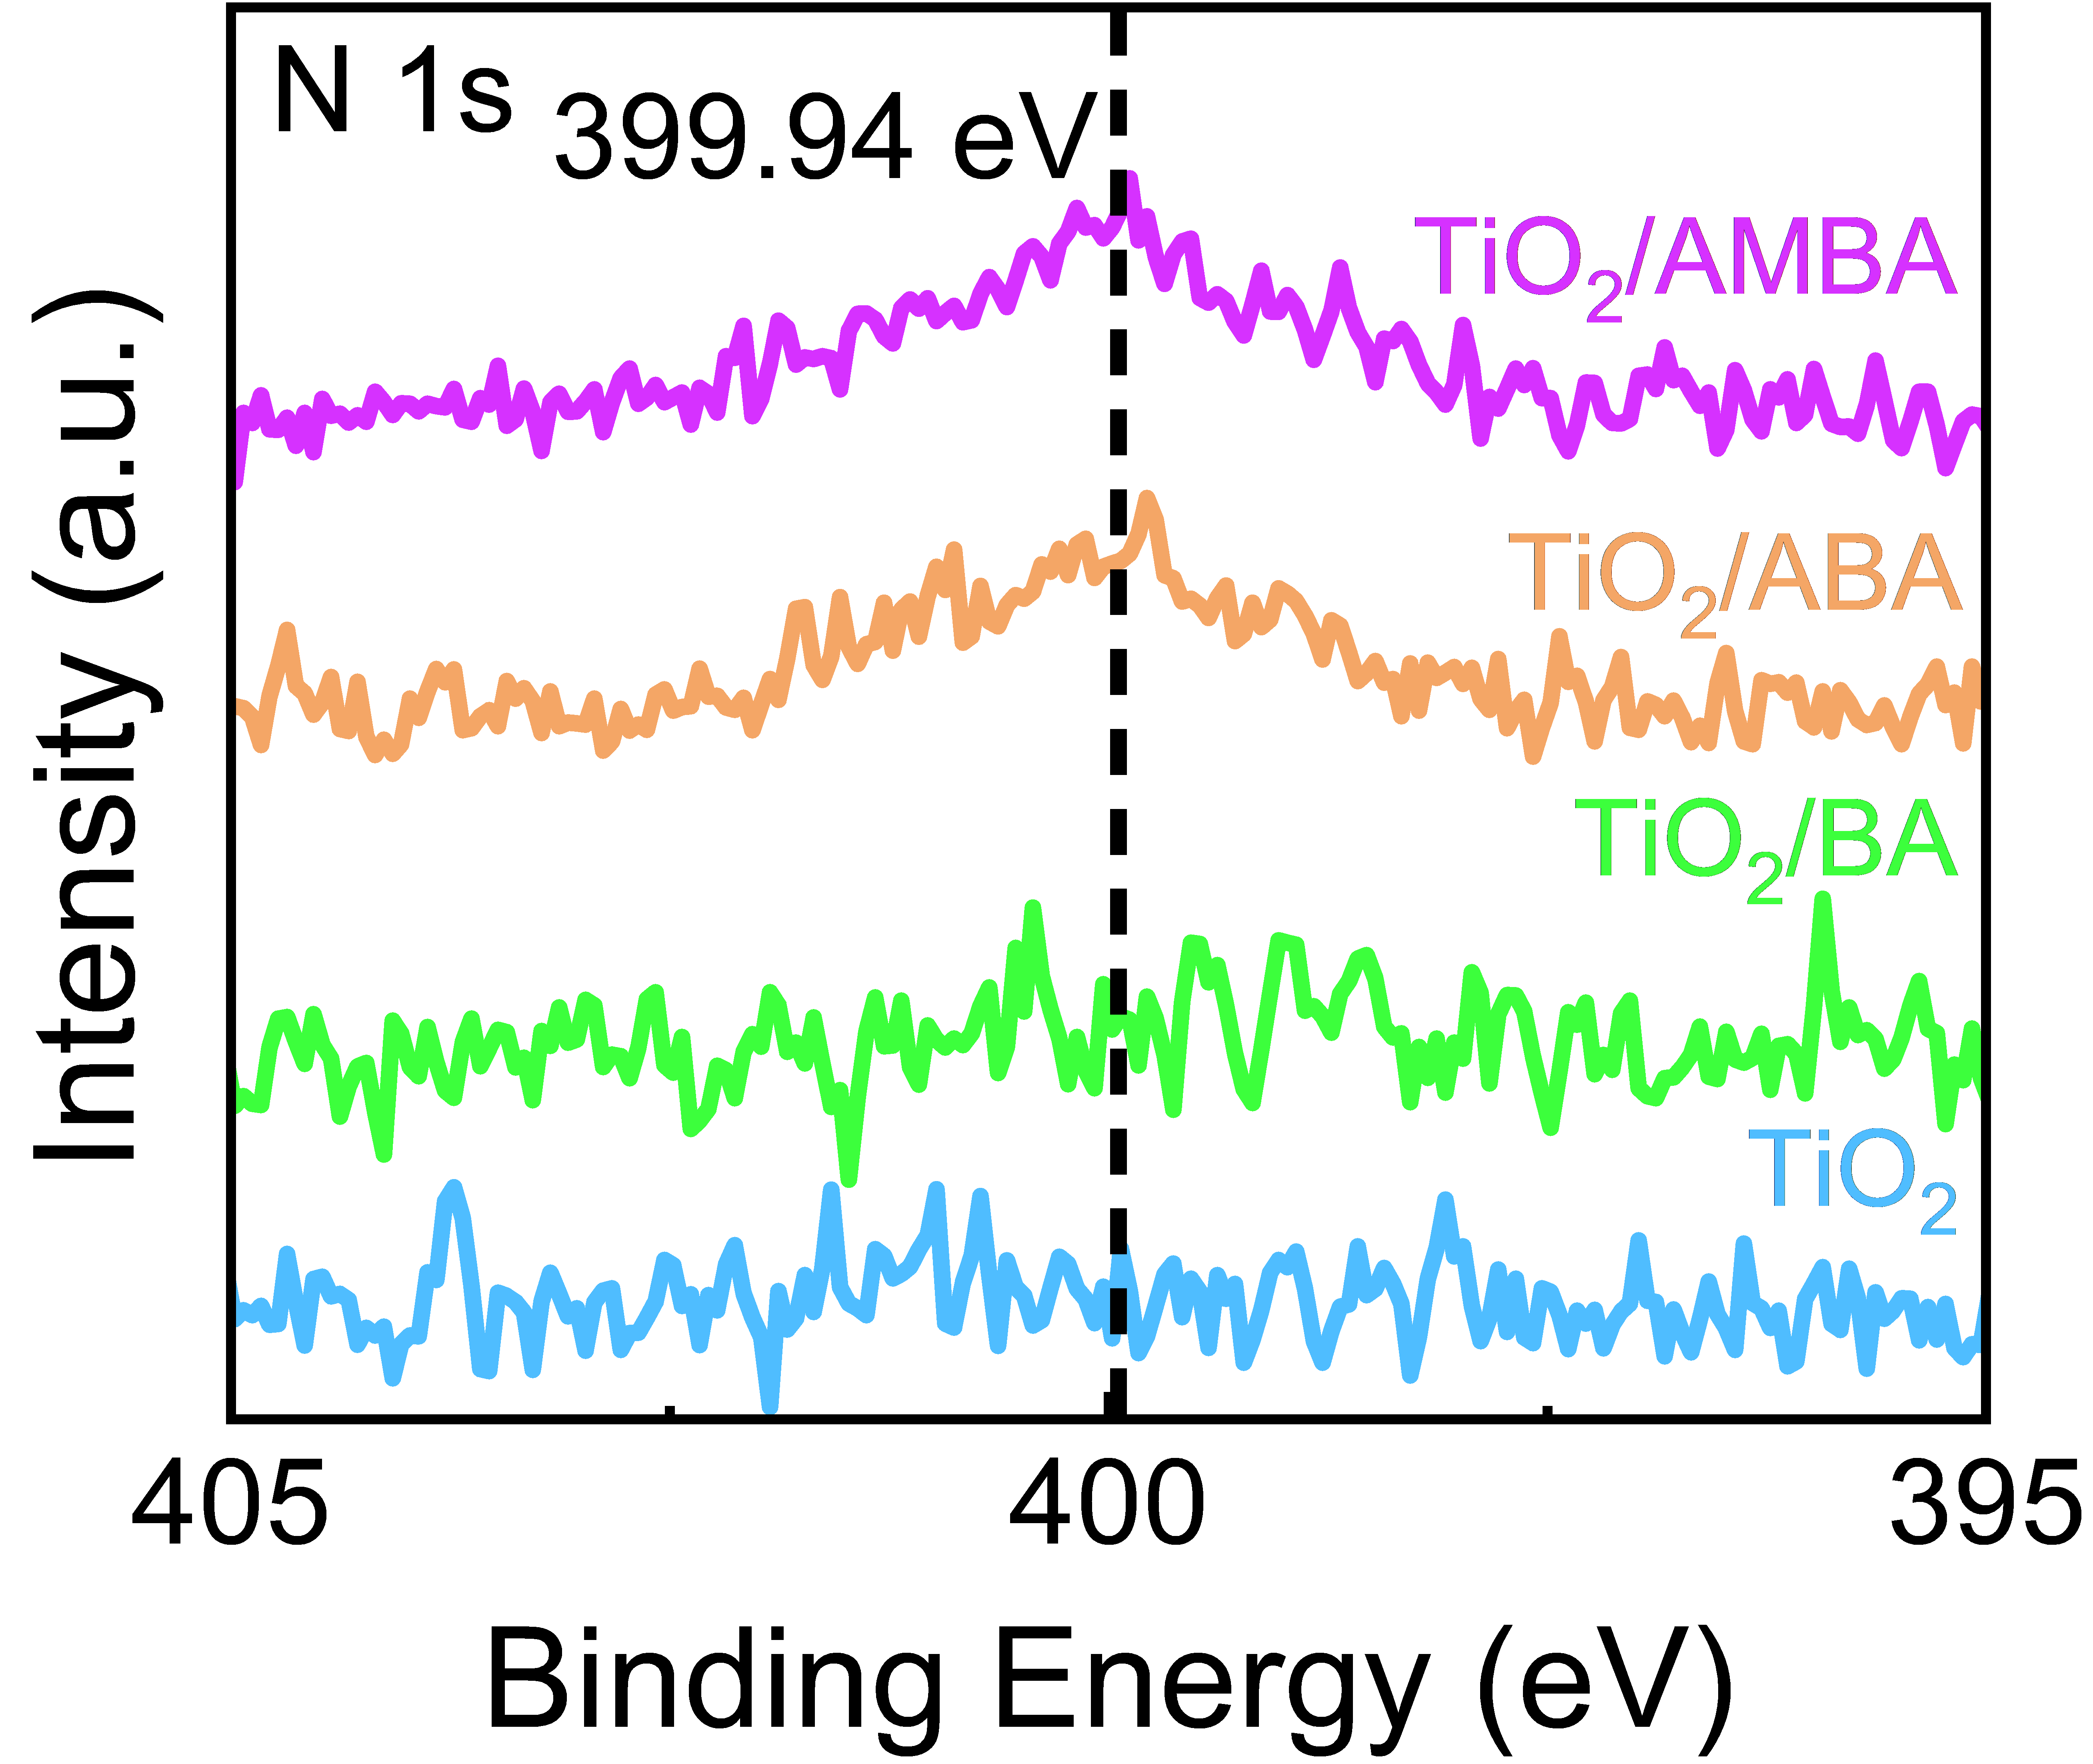


**Fig. S3** XPS spectra of N 1s for TiO2 and TiO2/BSAMs films.

**
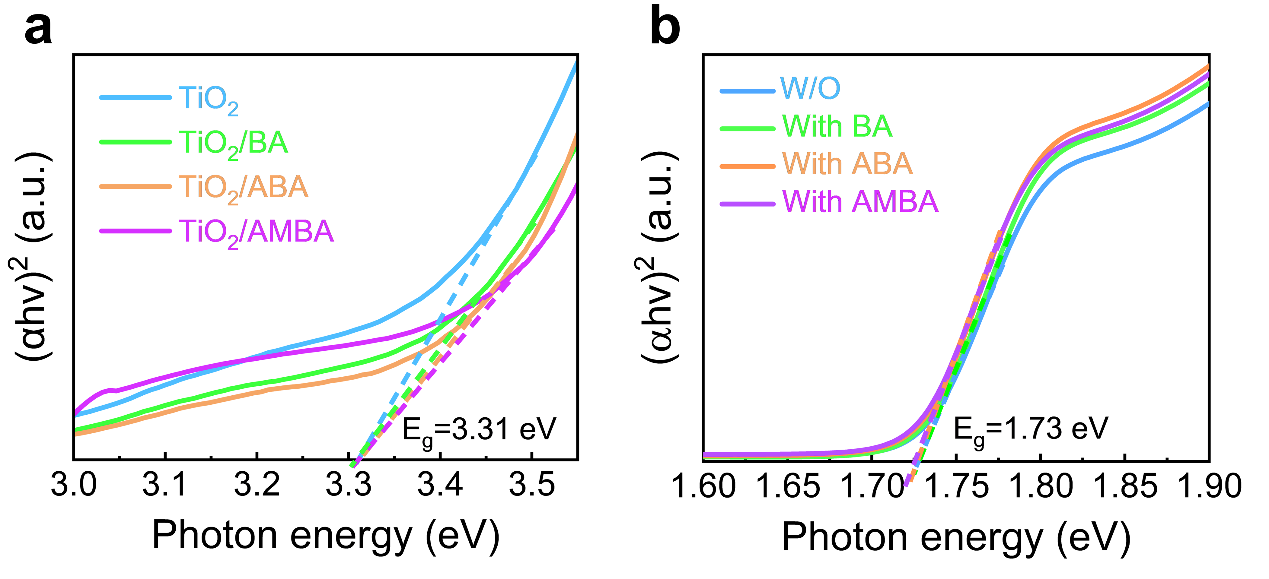
**

**Fig. S4** Tauc plots of the TiO2 (a) and CsPbI3-xBrx (b) without and with BSAMs.


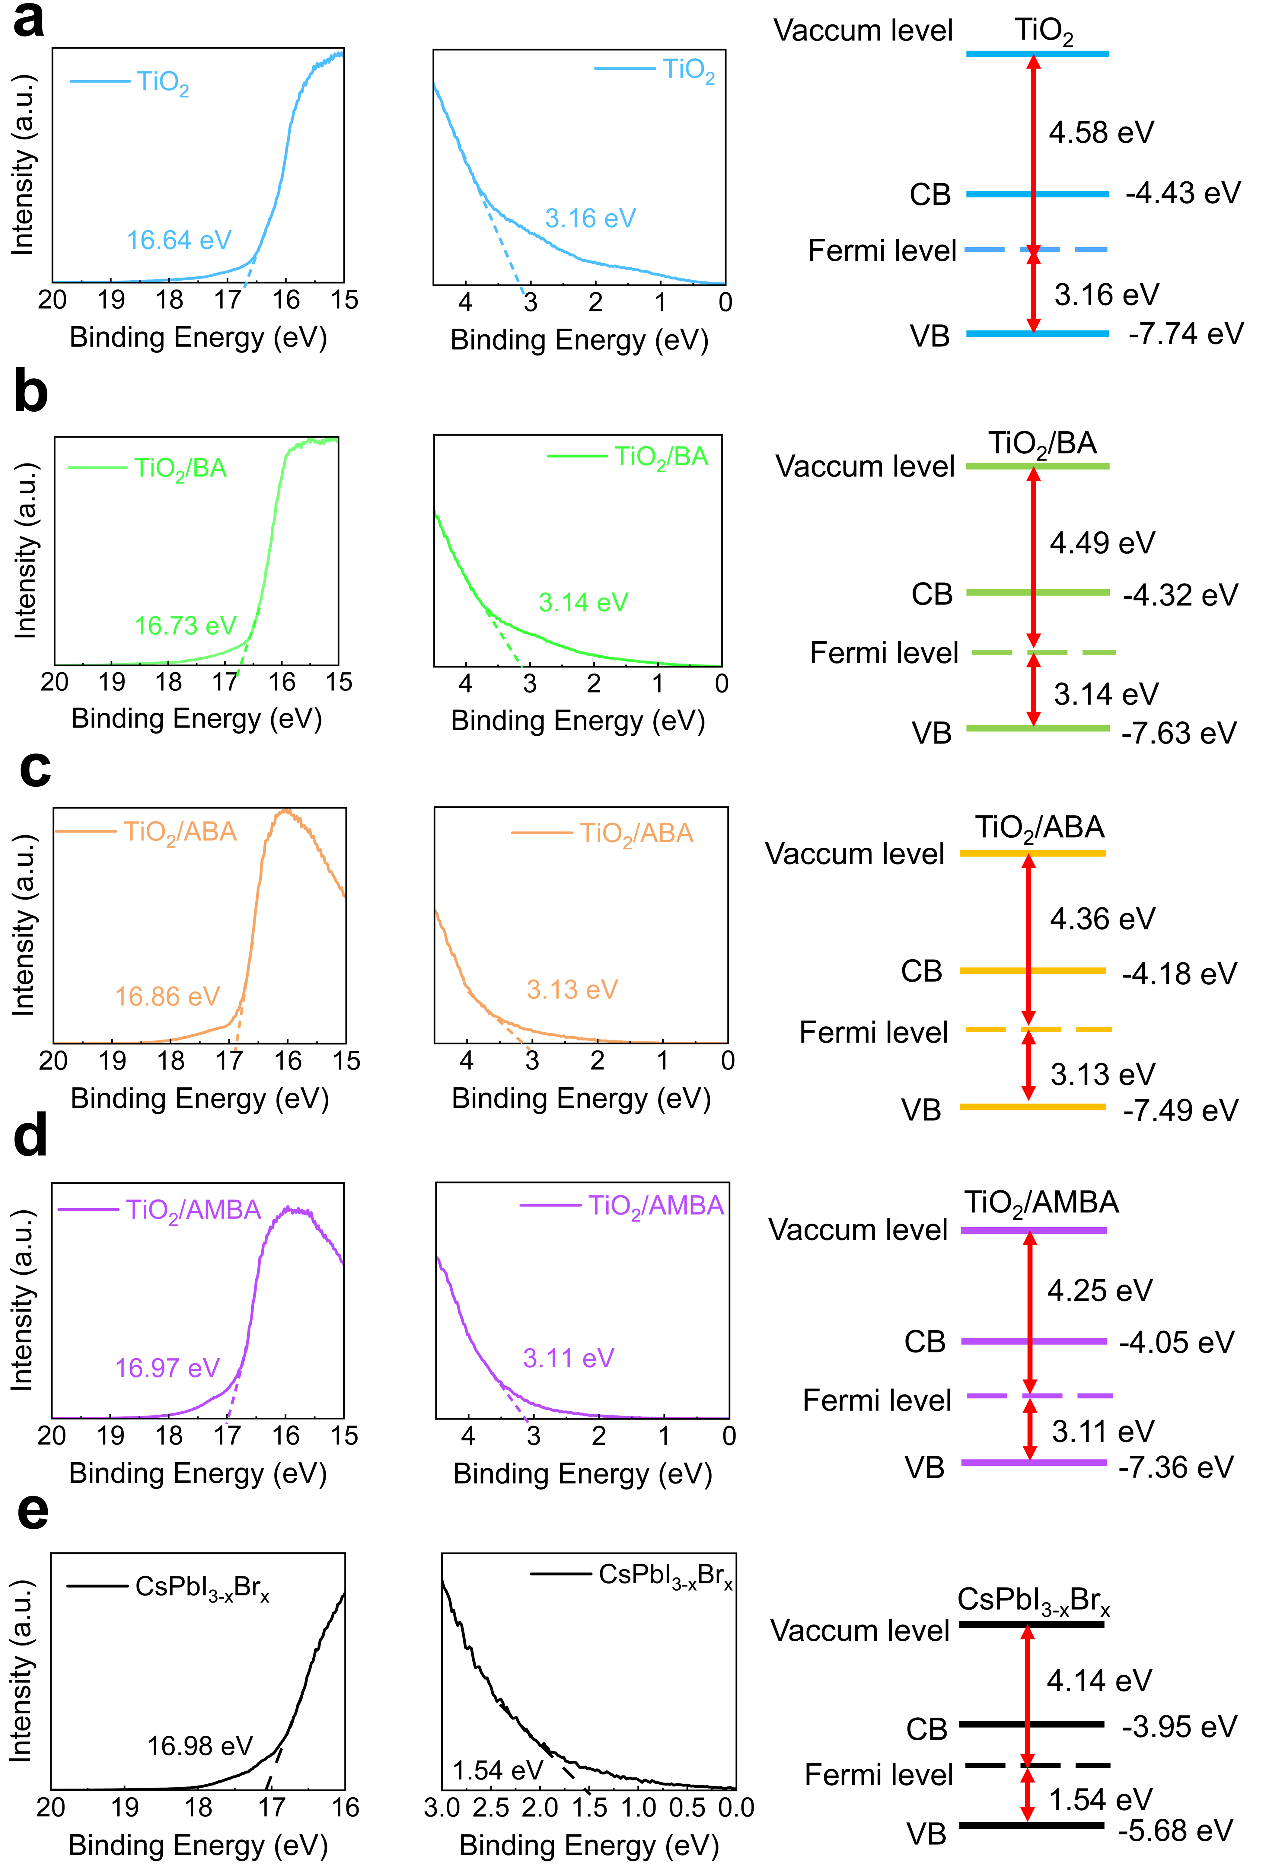


**Fig. S5** Cutoff regions, valence band edges of UPS spectra, and energy level diagram for TiO2 films (a) with BA (b), ABA (c), AMBA (d), and CsPbI3-xBrx (e).


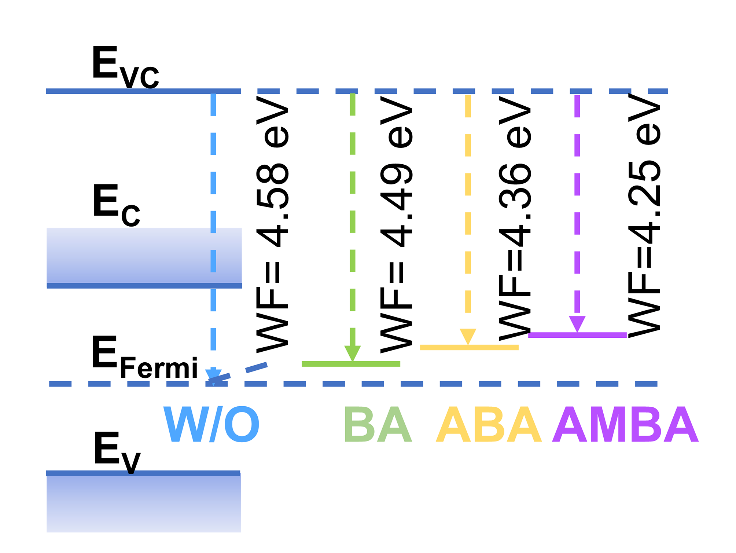


**Fig. S6** Schematic diagrams of work function (WF) for TiO2 films with BSAMs.


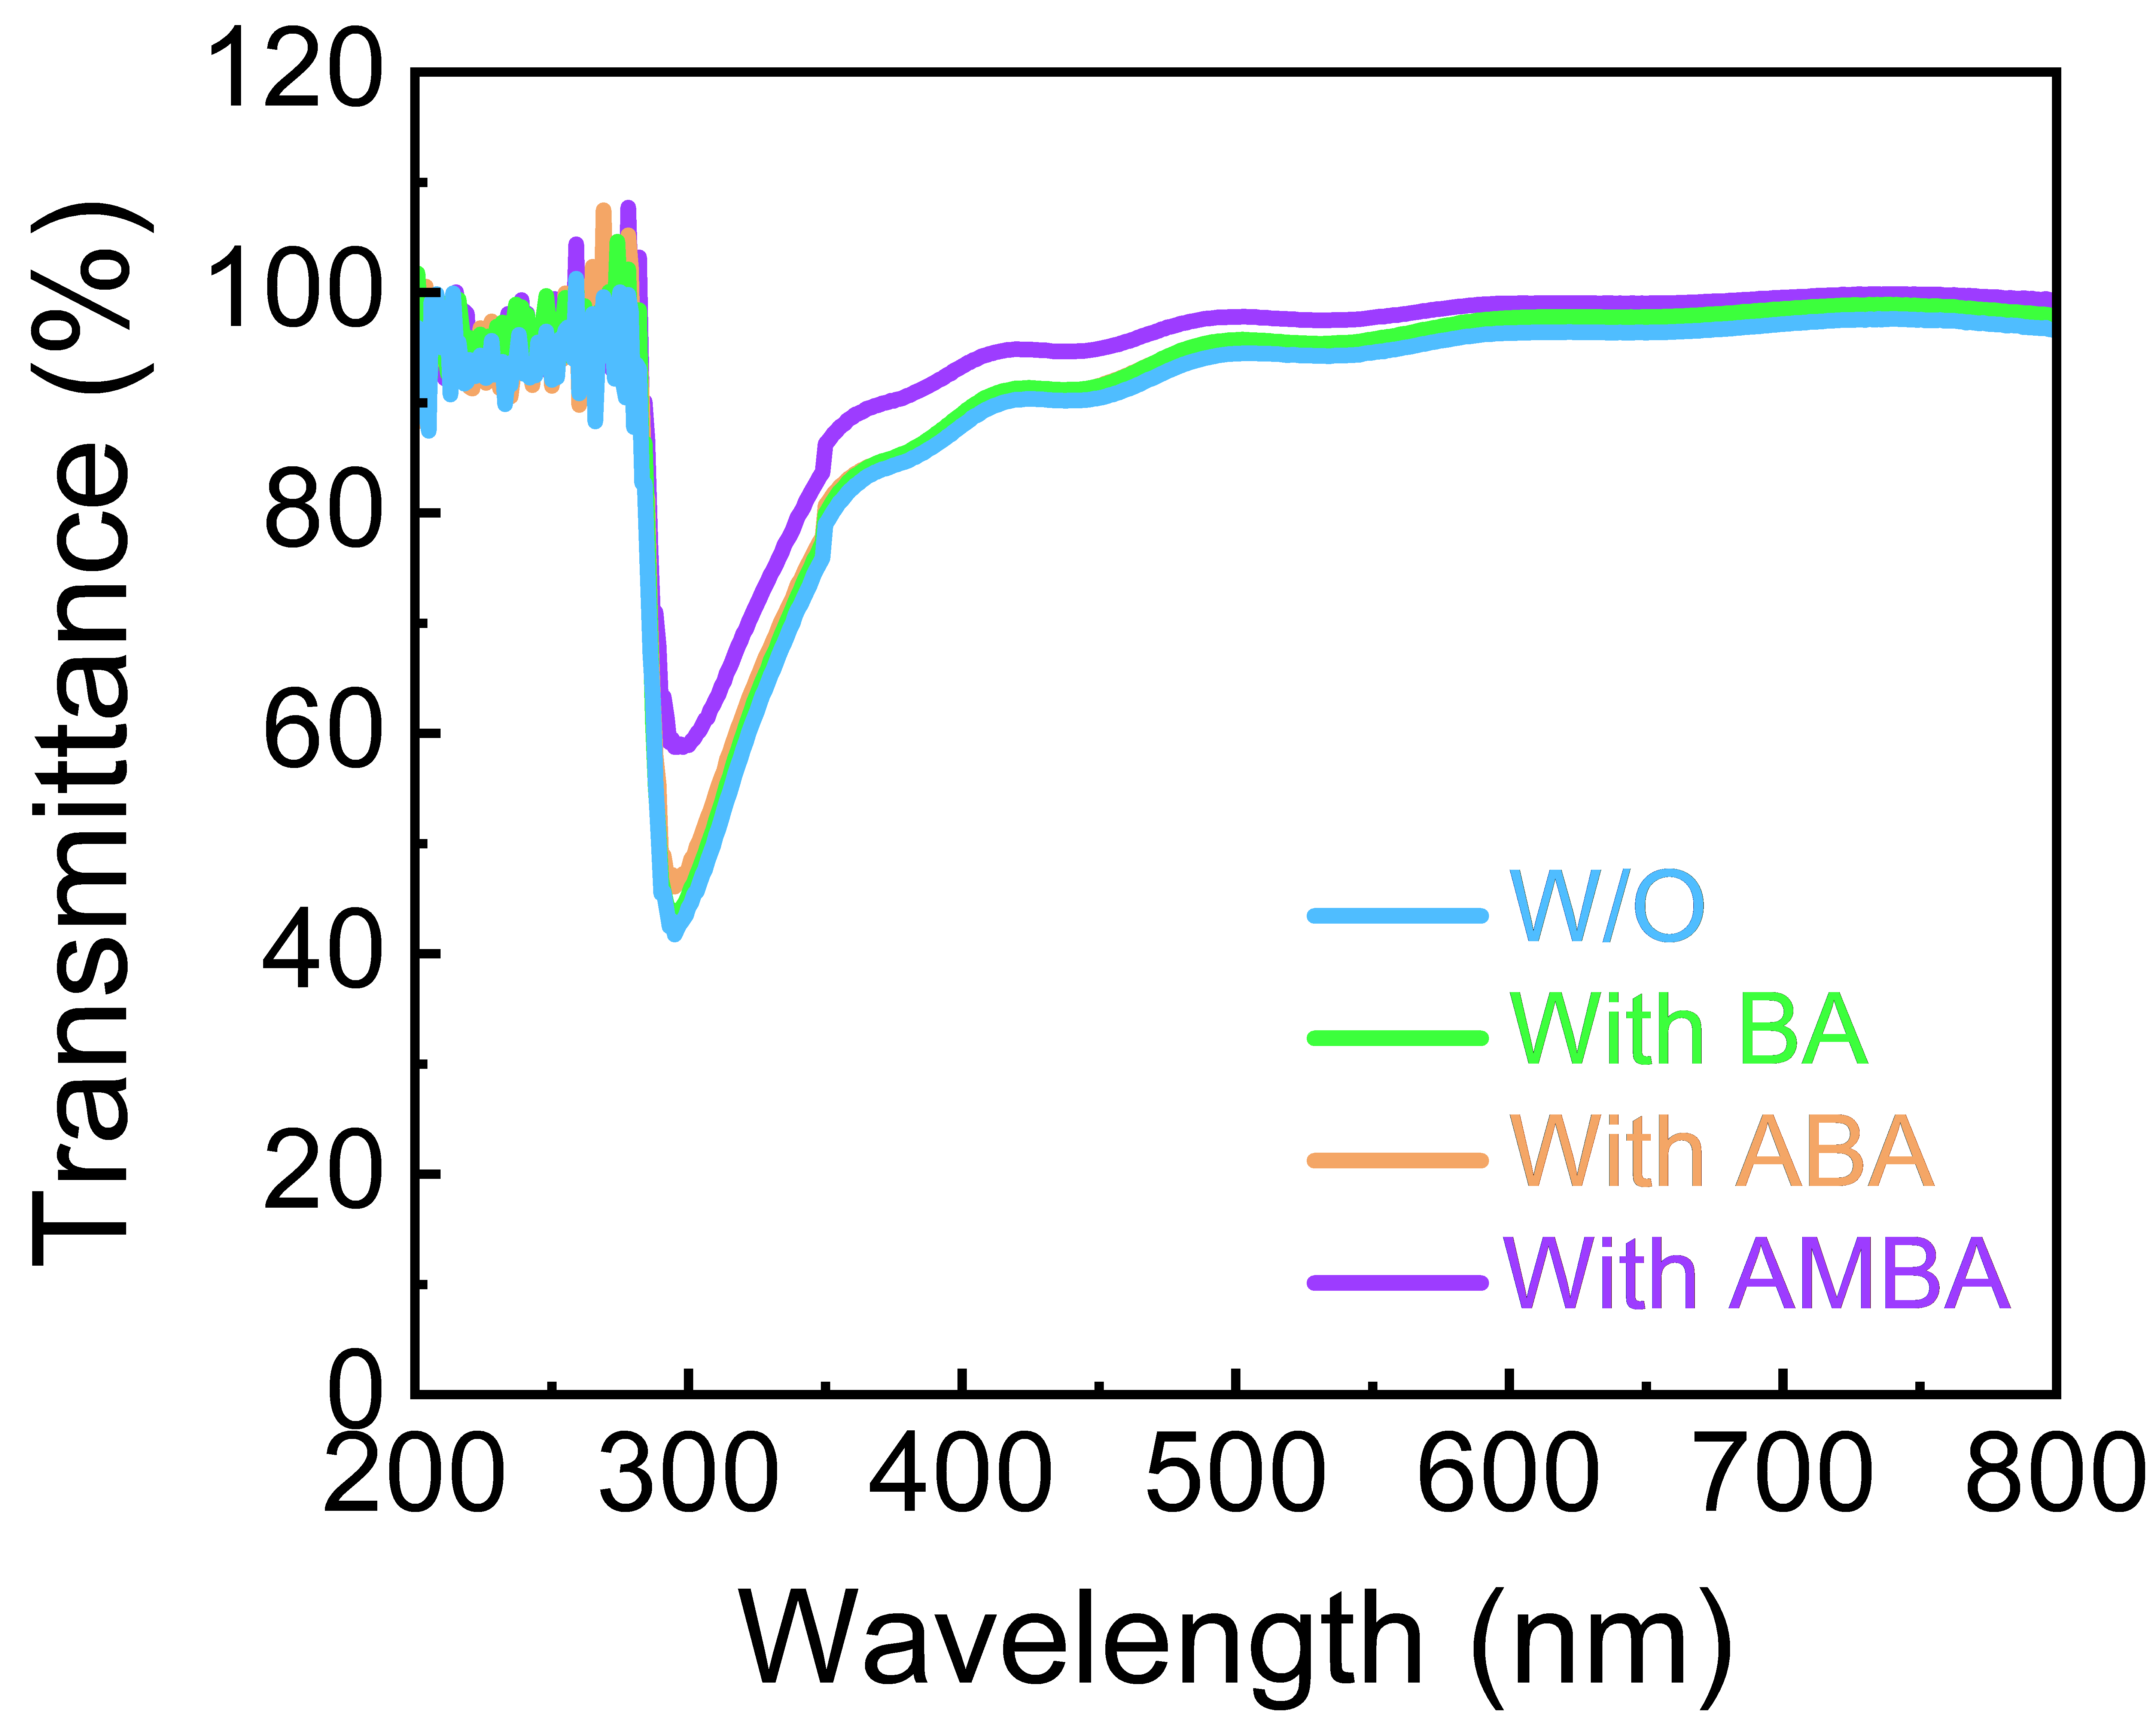


**Fig. S7** UV-vis transmittance spectra of FTO/TiO2 layer without and with BSAMs.


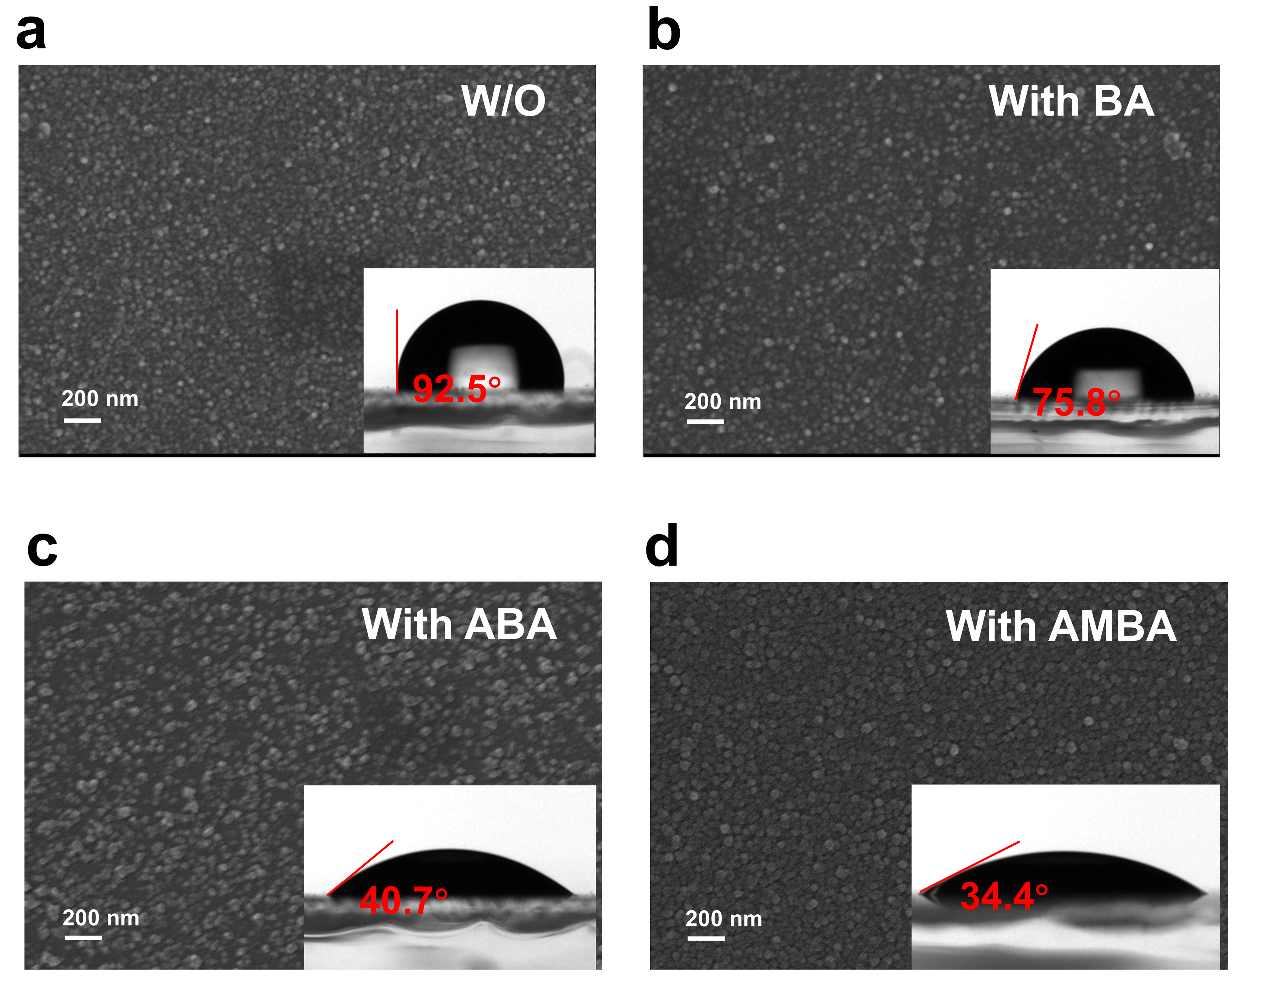


**Fig. S8** Top-view SEM images and CA results for TiO2 (a), with BA (b), ABA (c), and AMBA (d).


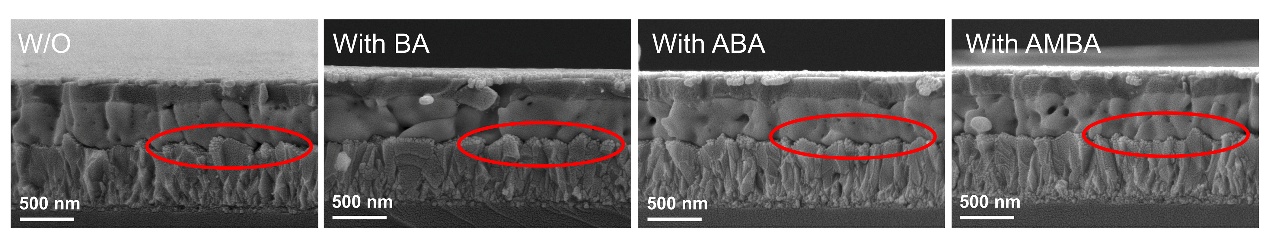


**Fig. S9** The cross-sectional SEM images without and with BSAMs.


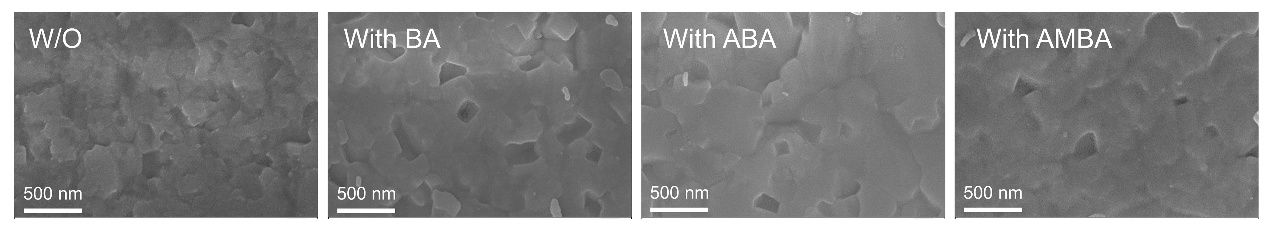


**Fig. S10** SEM images of the bottom surface for the perovskite films deposited on TiO2 without and with BSAMs.


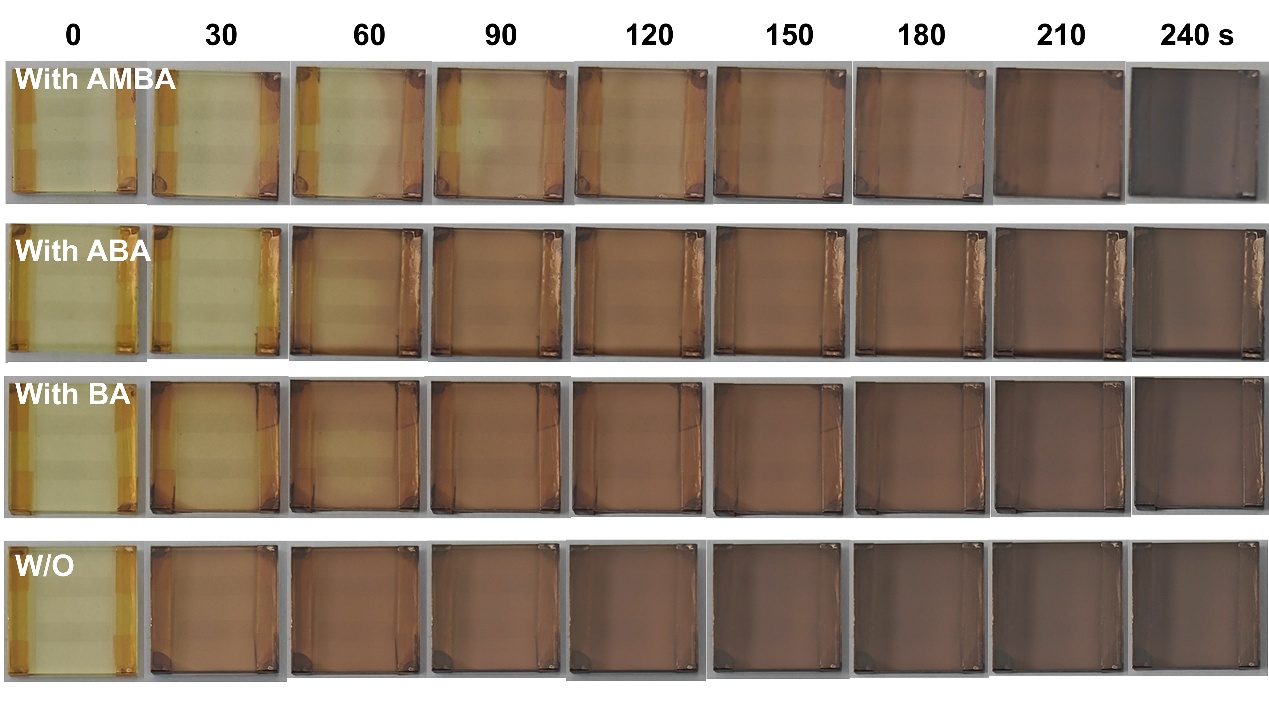


**Fig. S11** Photos of films without and with BSAMs annealed at 190°C.


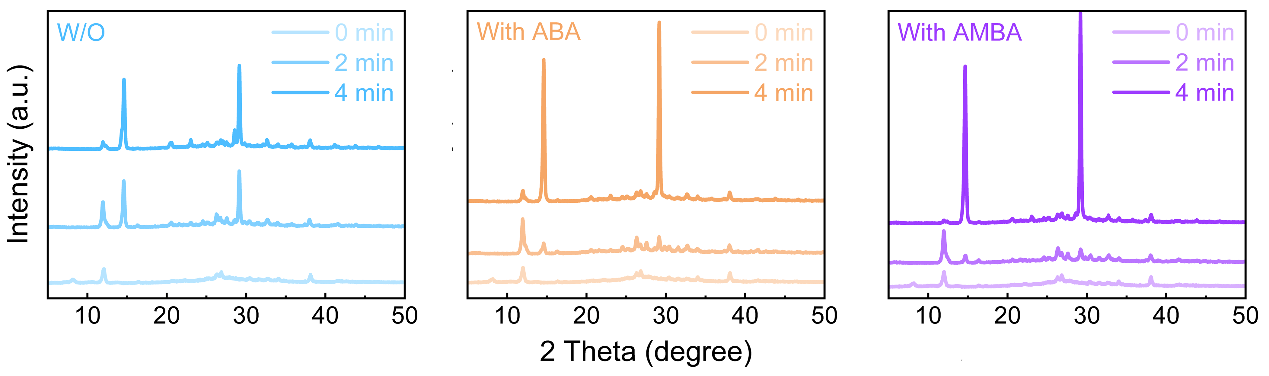


**Fig. S12** The XRD pattern of perovskite films without and with ABA/AMBA during the annealing.


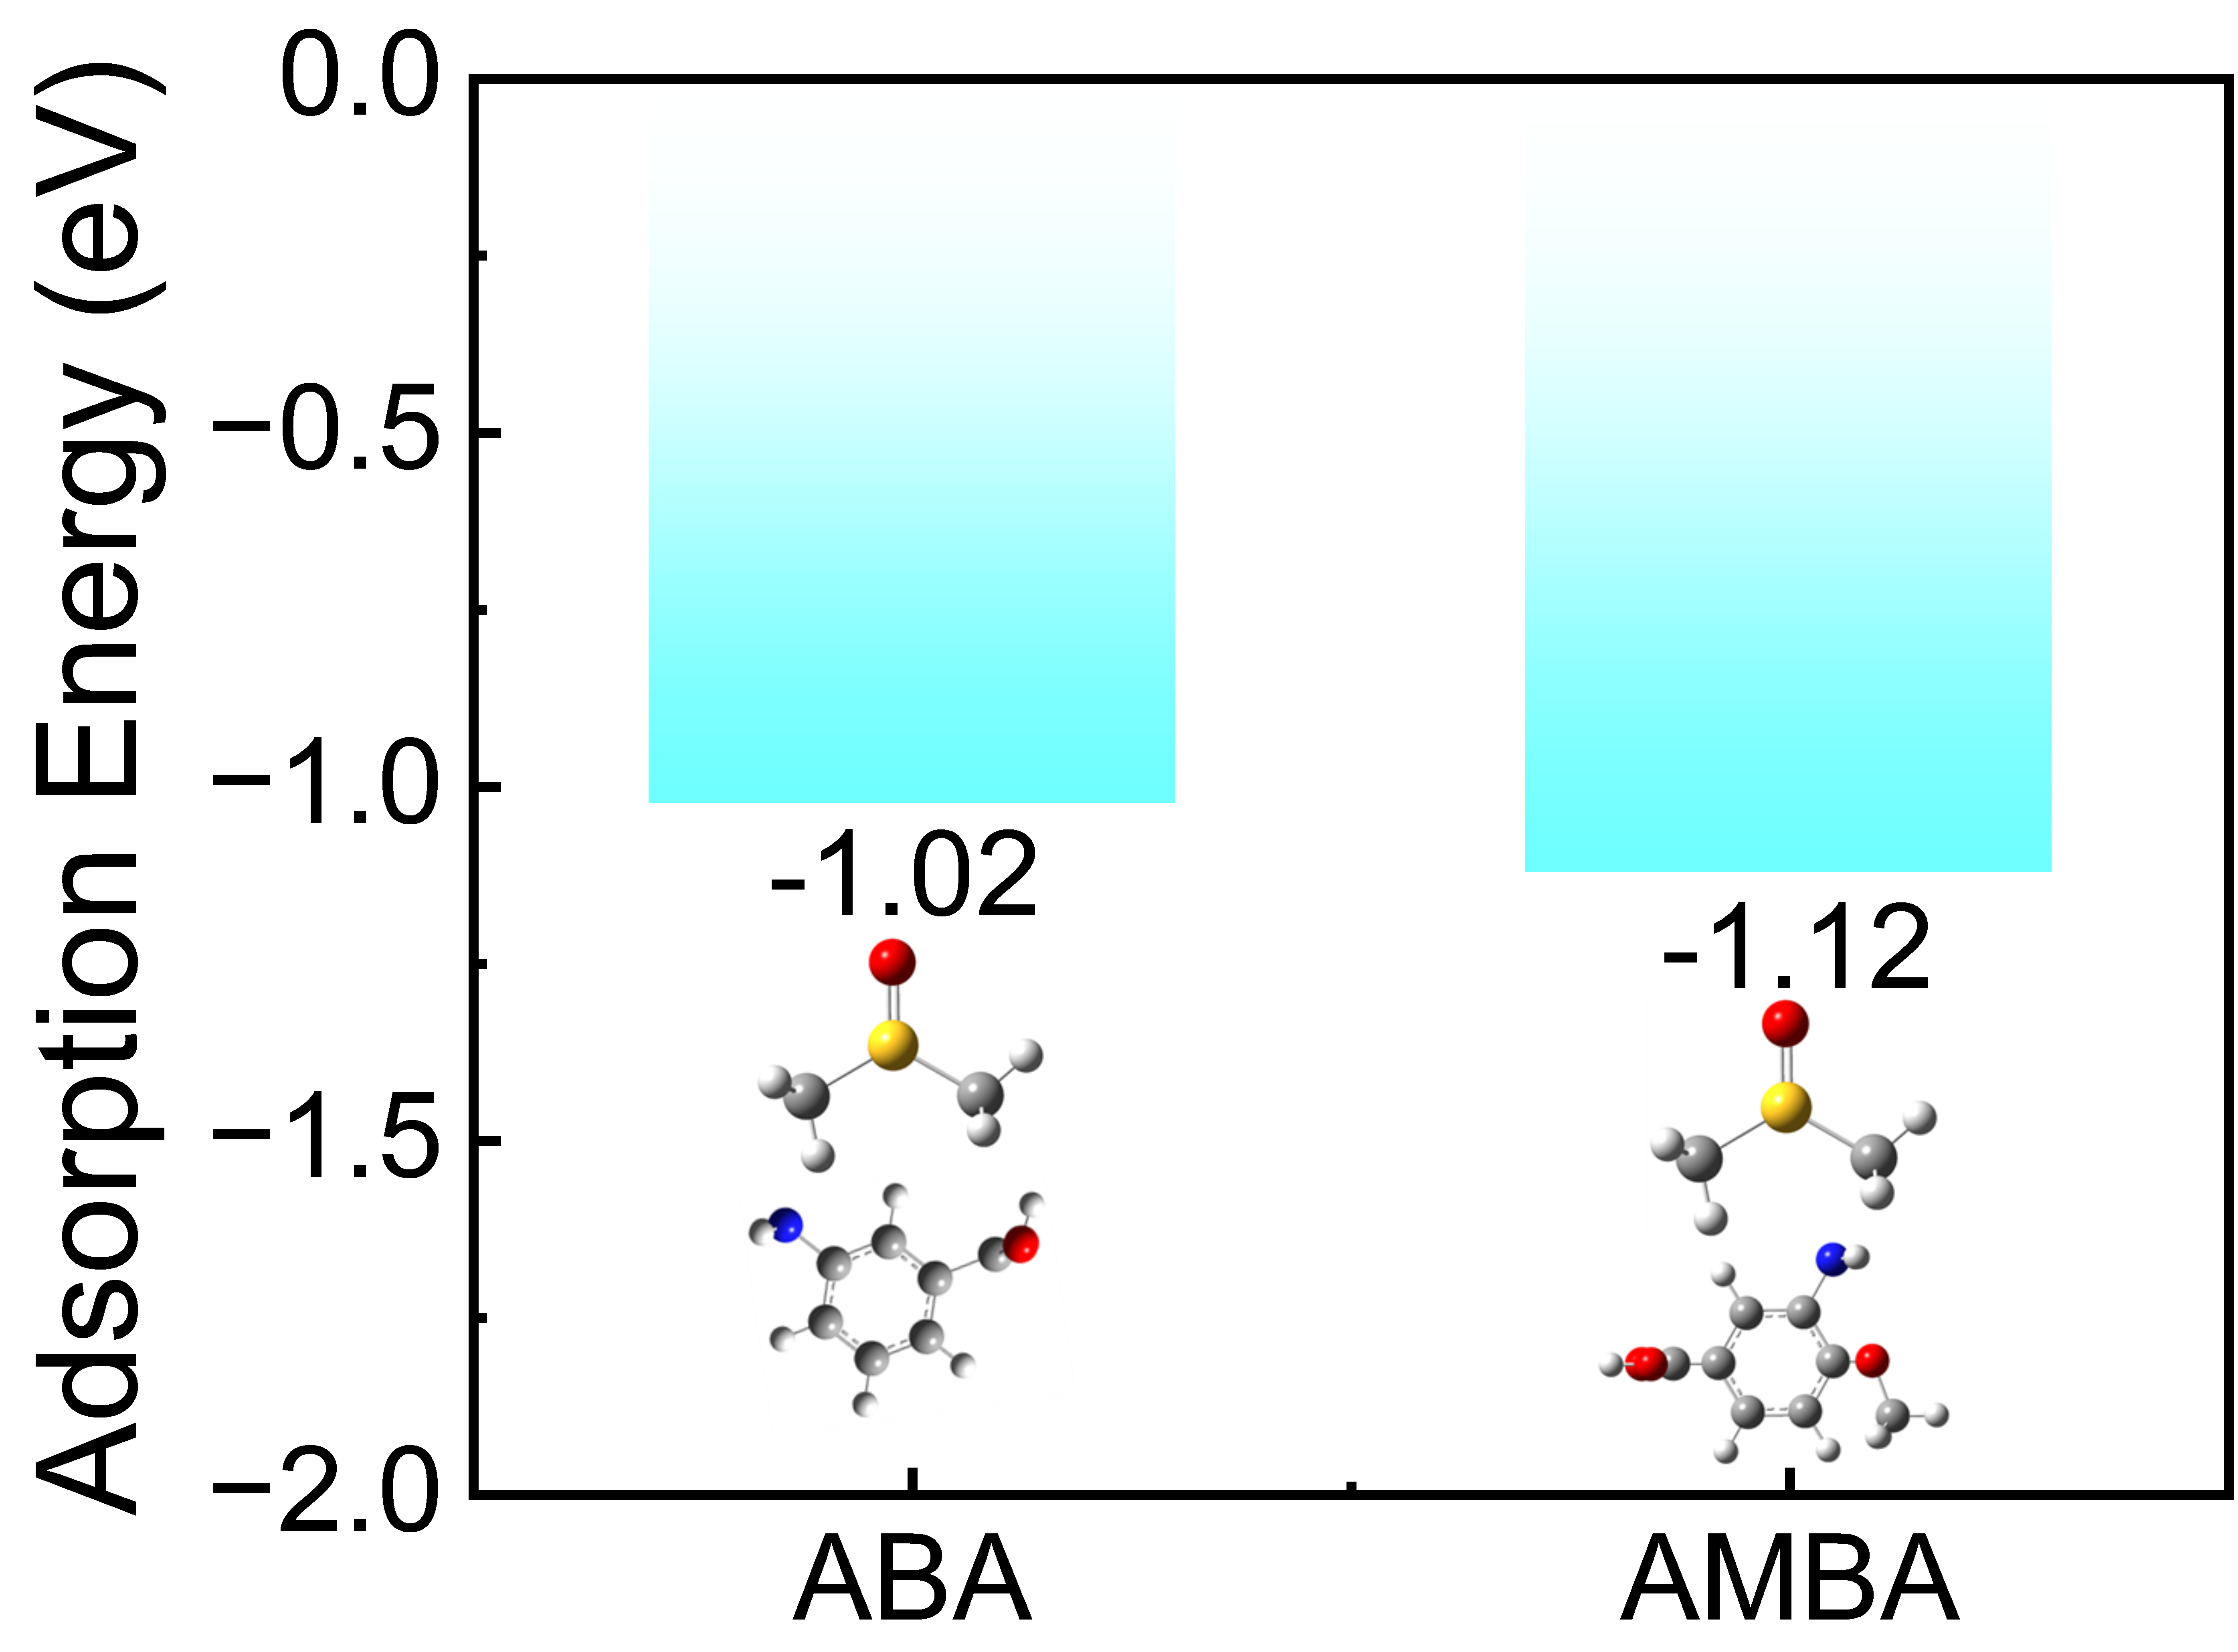


**Fig. S13** Adsorption energies between ABA/AMBA and DMSO.


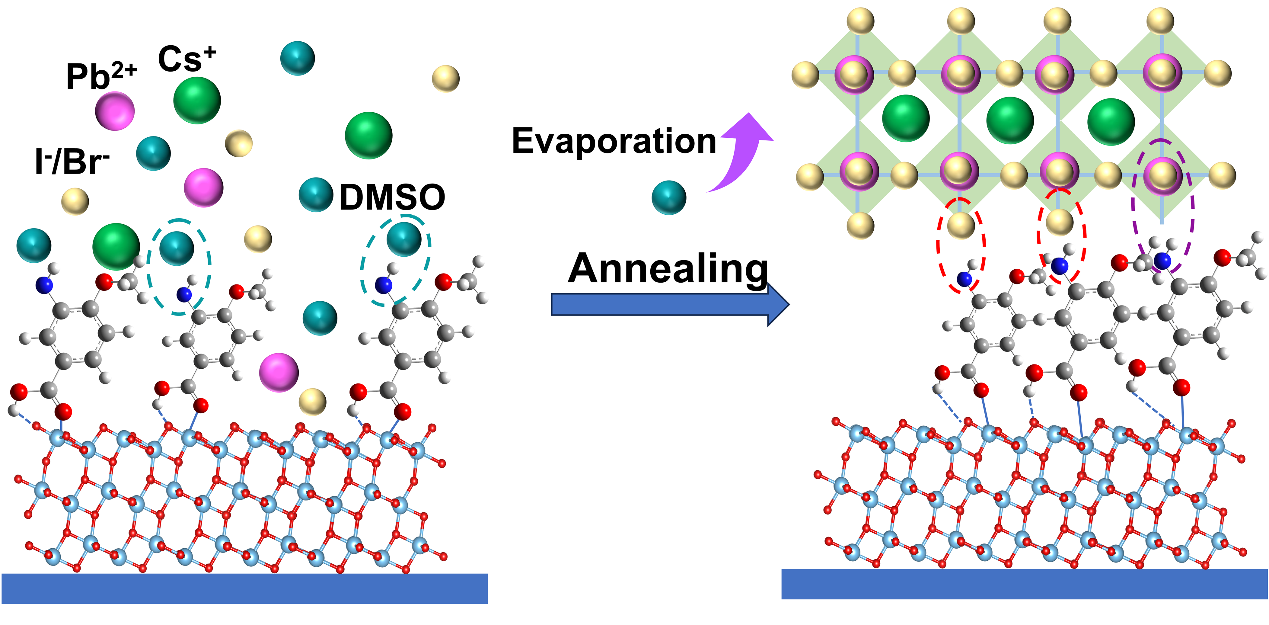


**Fig. S14** The schematic diagram of perovskite crystallization in the annealing process.

**
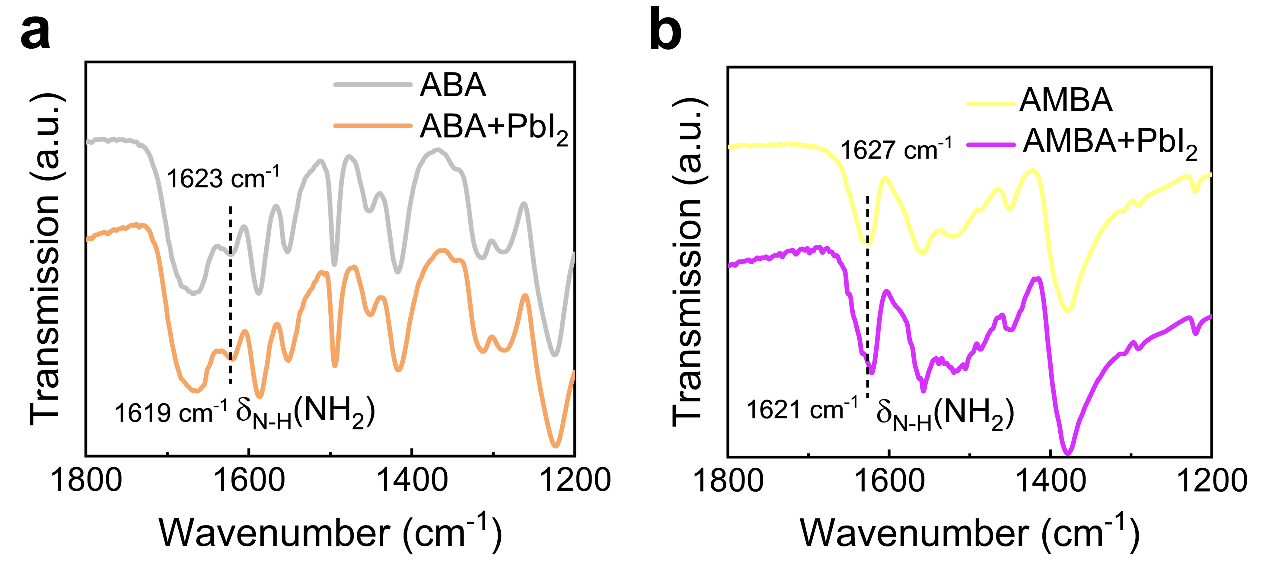
**

**Fig. S15** FTIR spectra for (a) ABA and ABA+PbI2 and (b) AMBA and AMBA+PbI2.


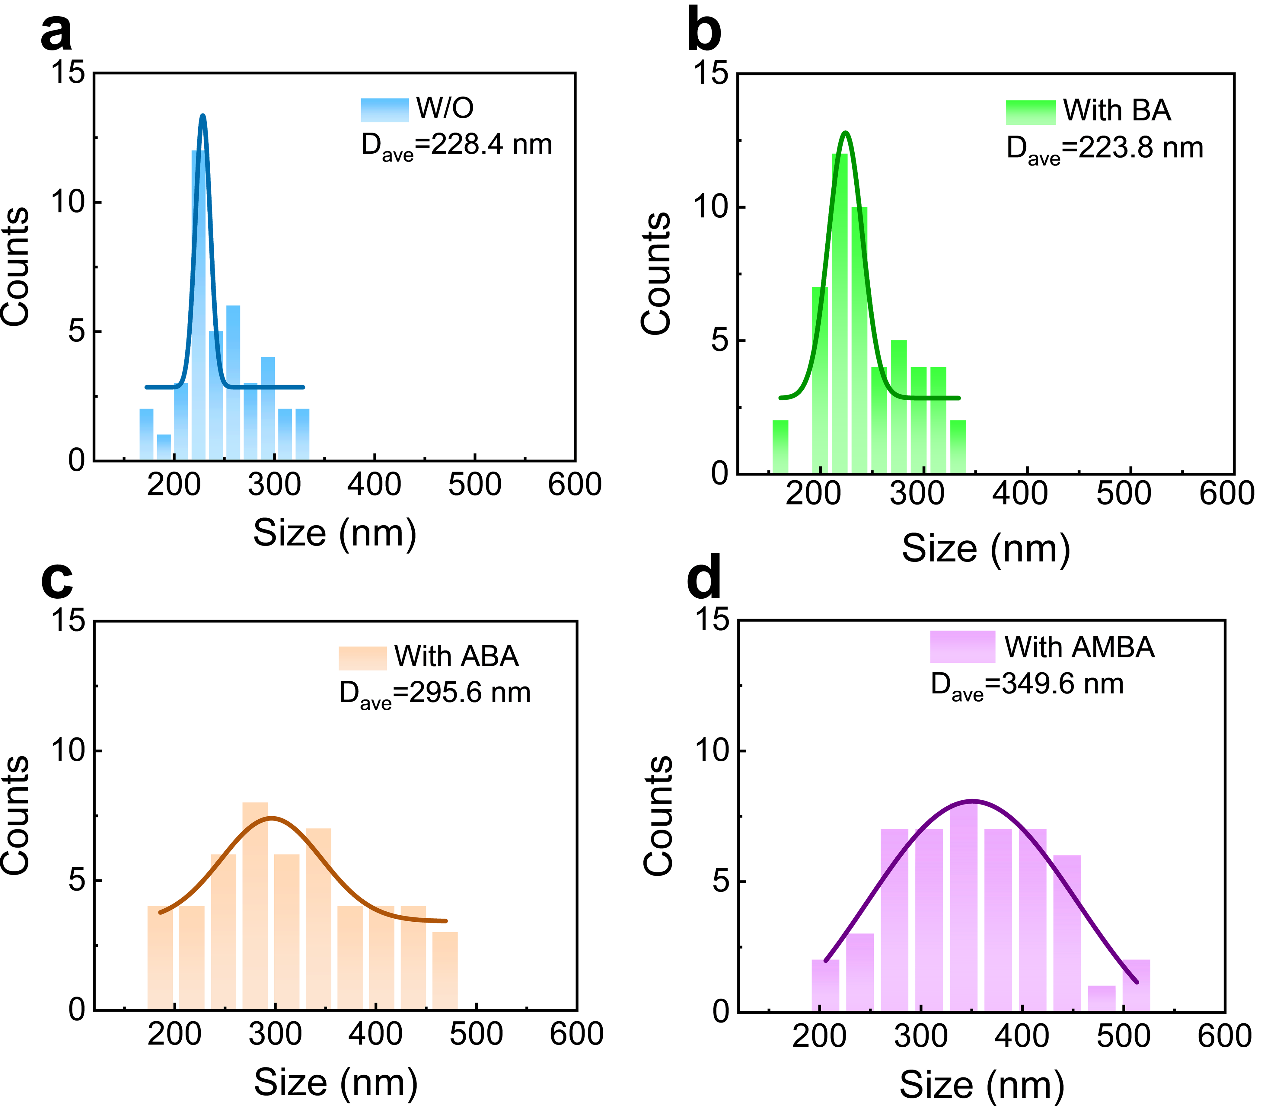


**Fig. S16** Statistical results of the perovskite grain size without and with BSAMs.


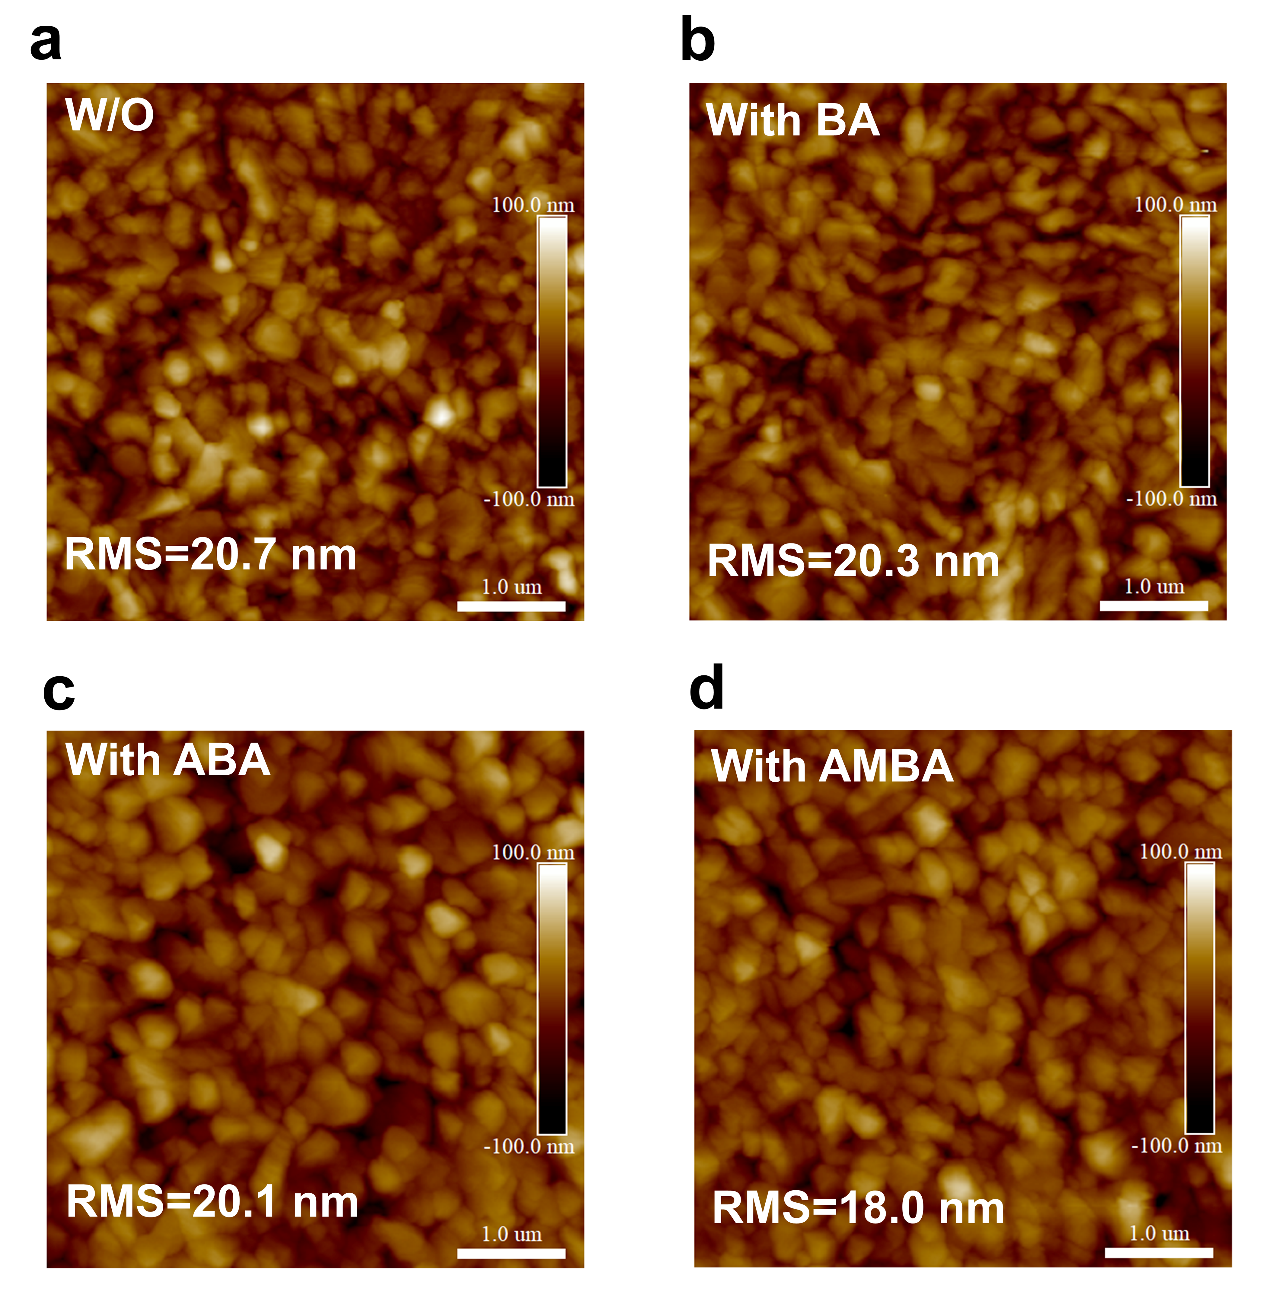


**Fig. S17** AFM images of perovskite layers without and with BSAMs.


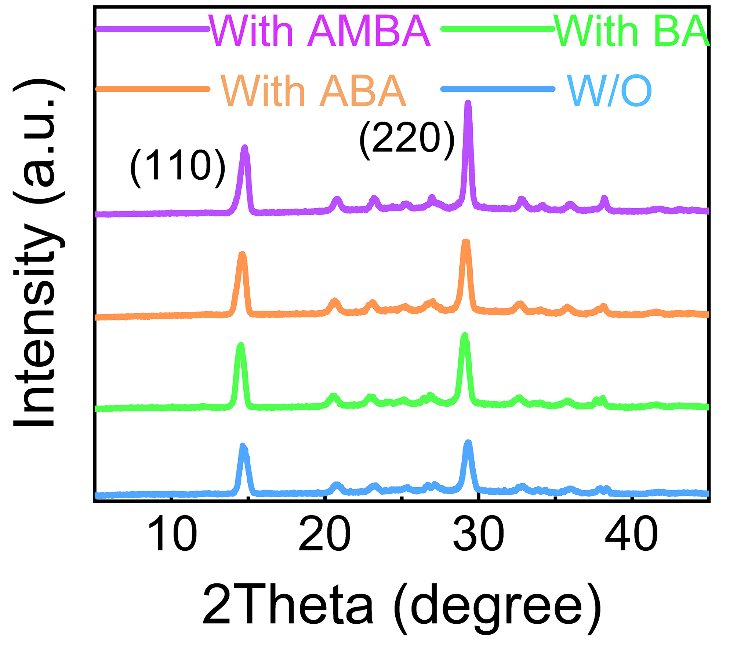


**Fig. S18** XRD spectra for CsPbI3-xBrx films without and with BSAMs.


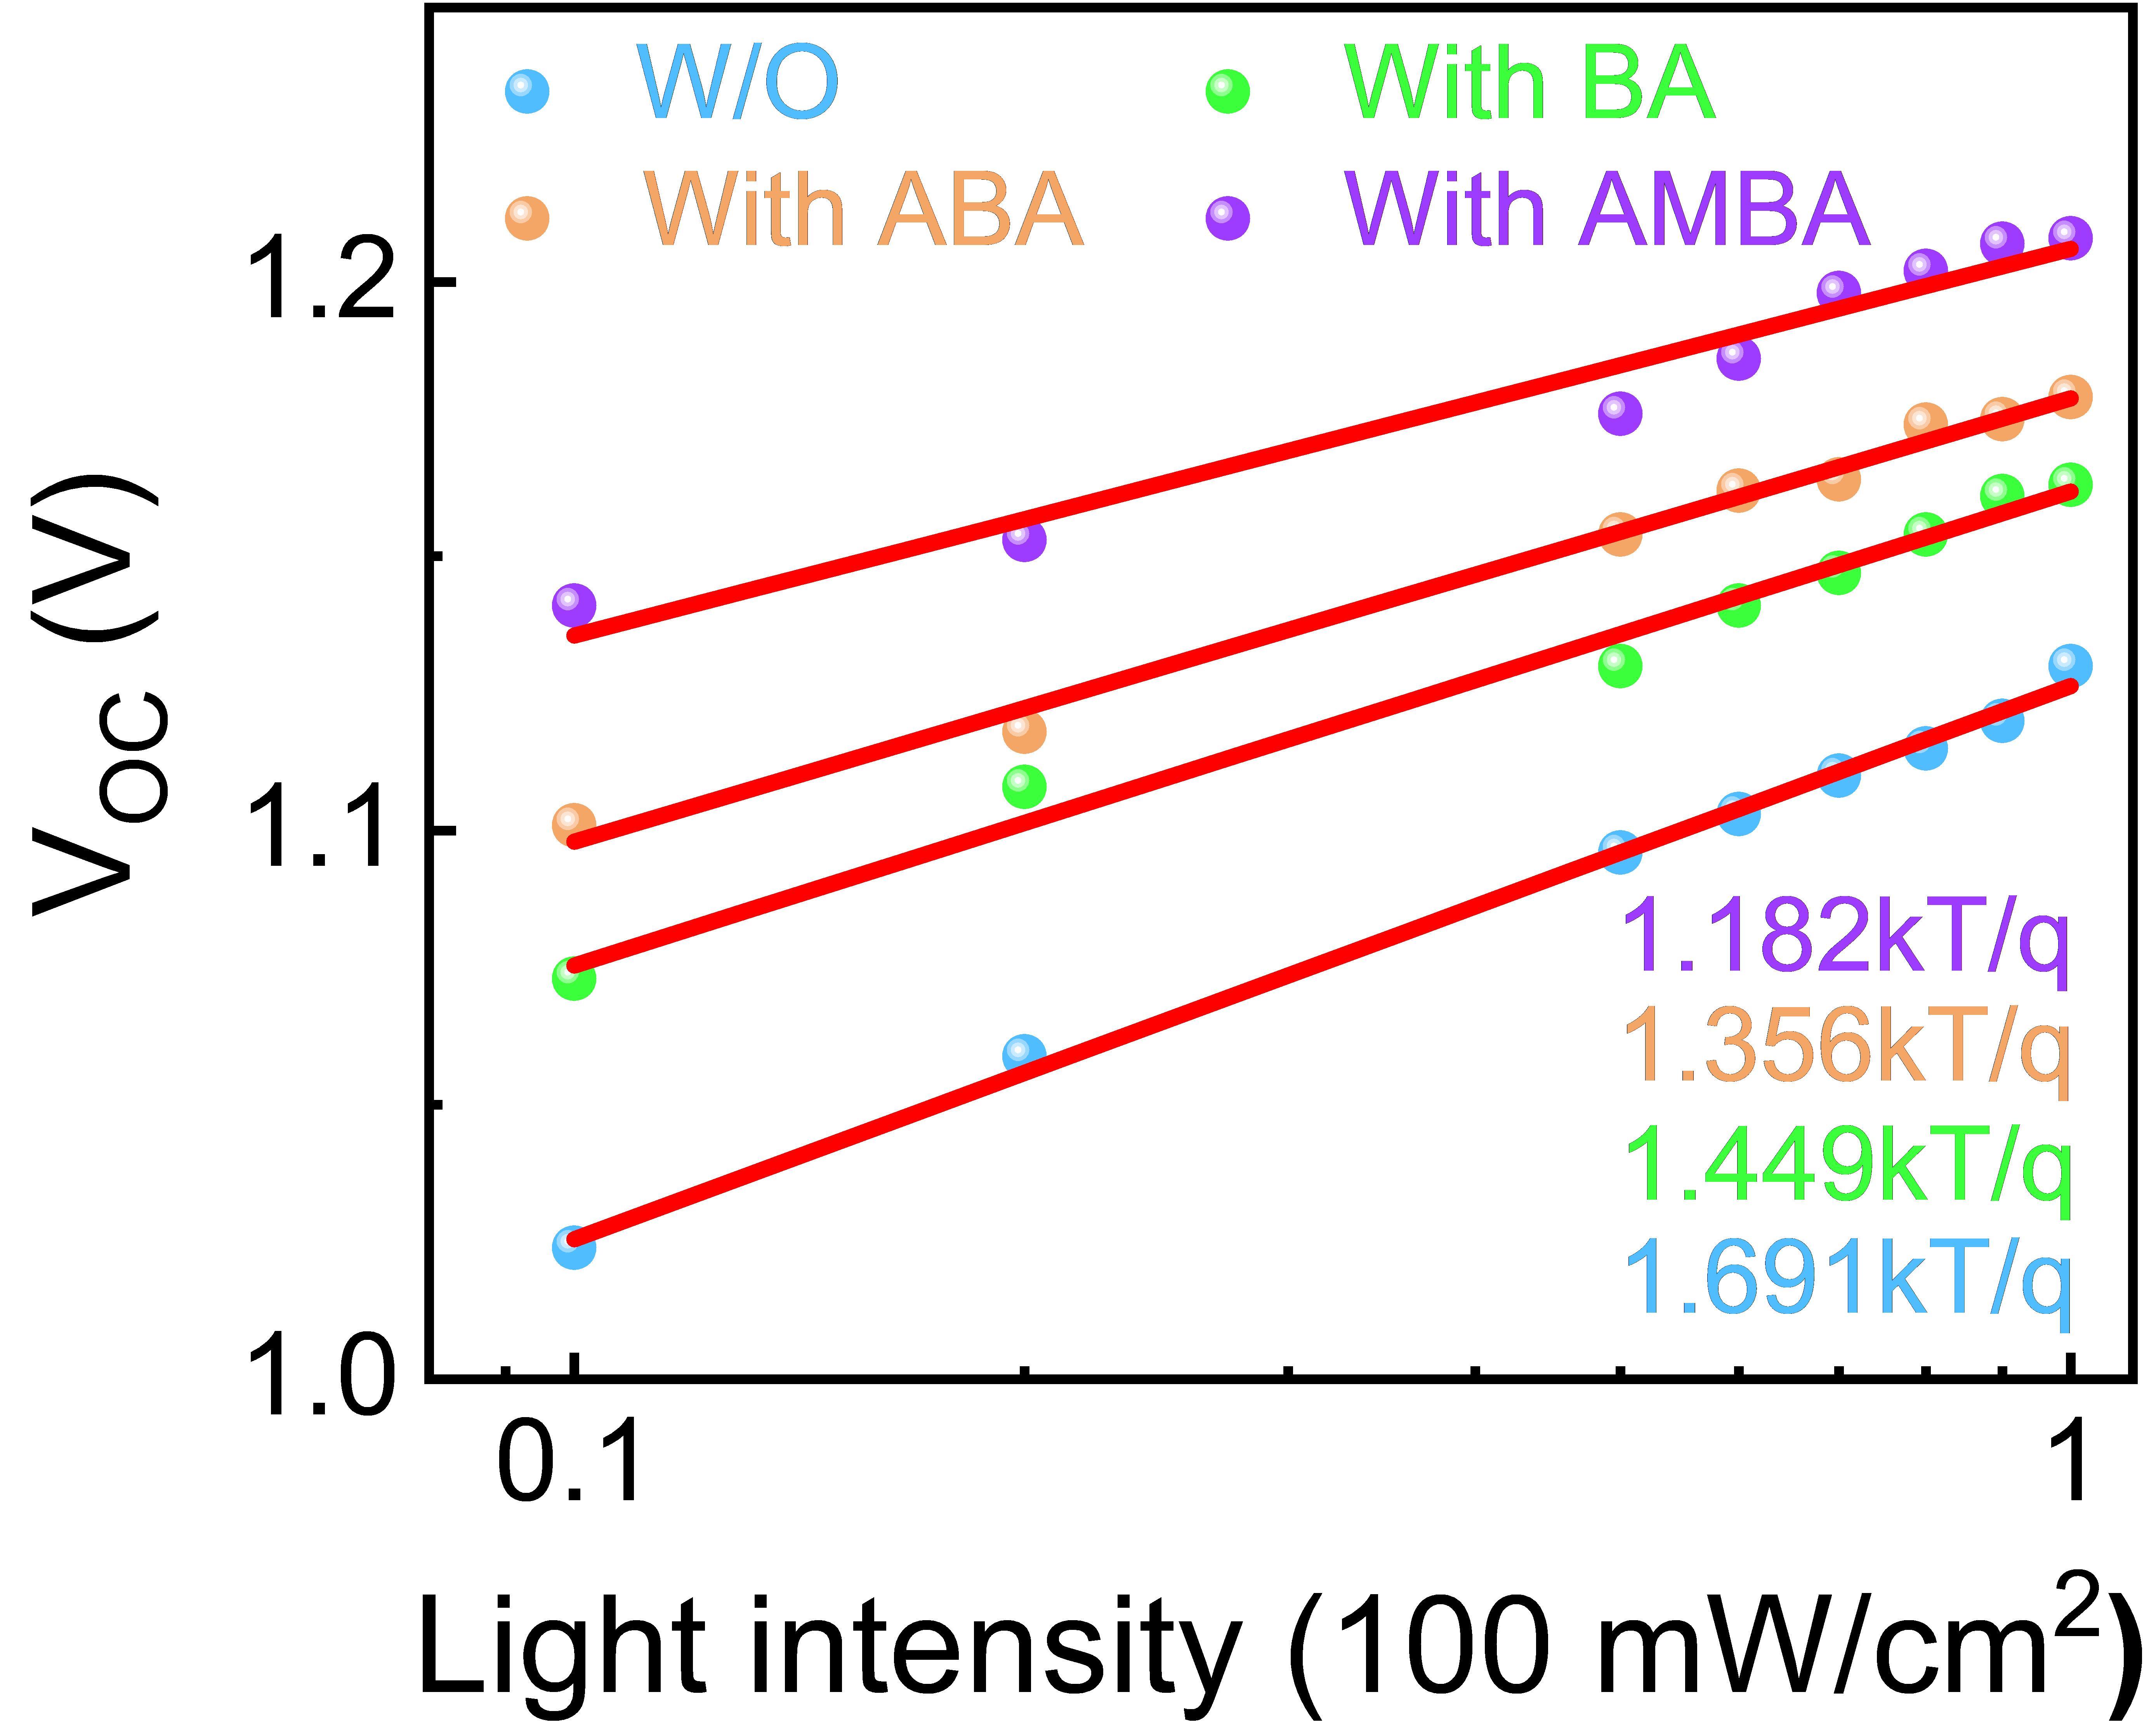


**Fig. S19** VOC dependence on light intensity for the CsPbI3-xBrx PSCs without and with BSAMs.


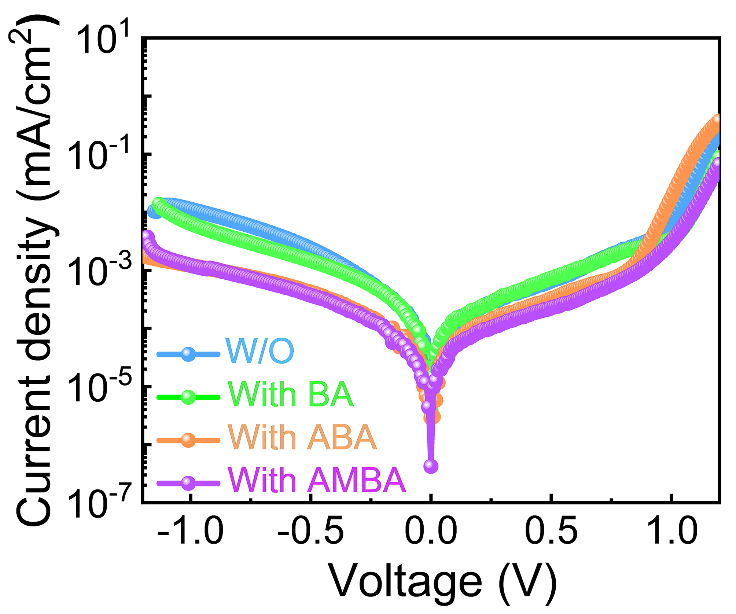


**Fig. S20** The dark J-V curves of devices without and with BSAMs.


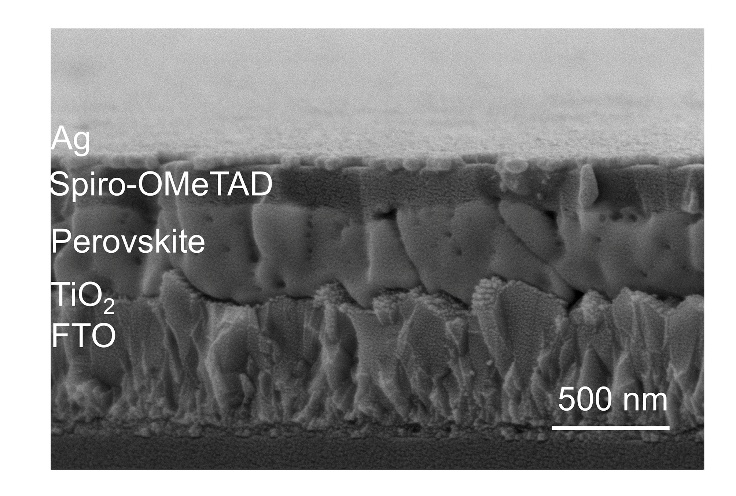


**Fig. S21** Cross-sectional SEM image of the CsPbI3-xBrx-based device.


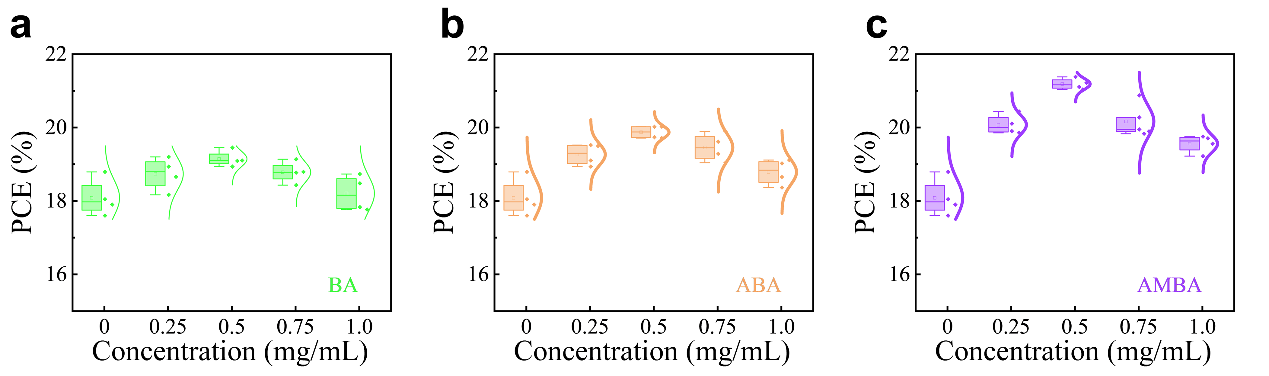


**Fig. S22** PCE of devices with different concentrations of (a) BA, (b) ABA, and (c) AMBA.


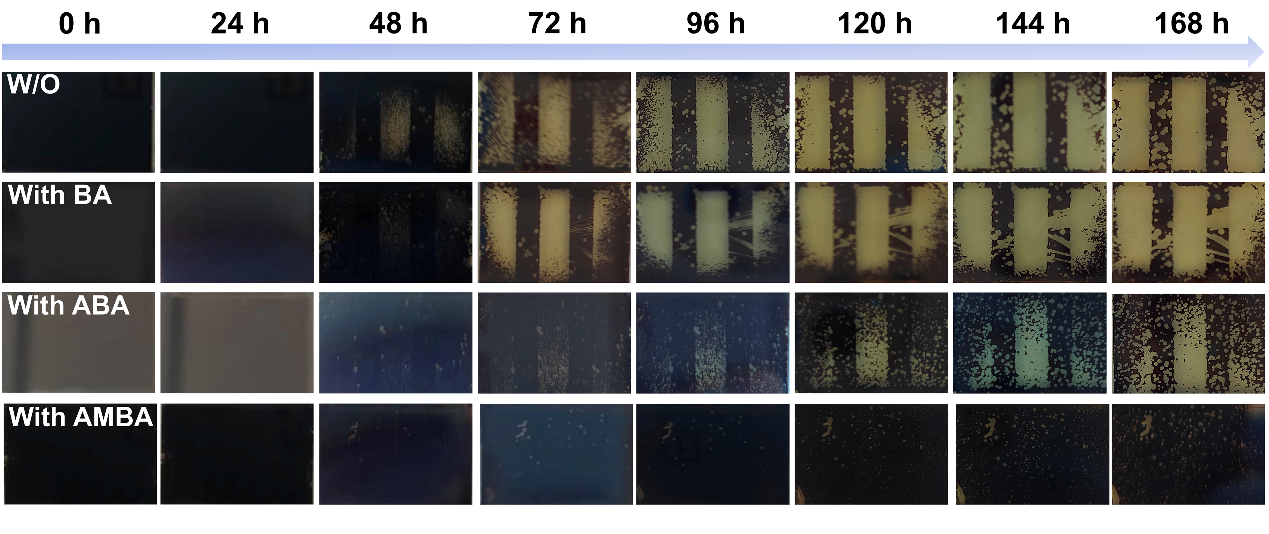


**Fig. S23** Photographs of films without and with BSAMs at different storage times.


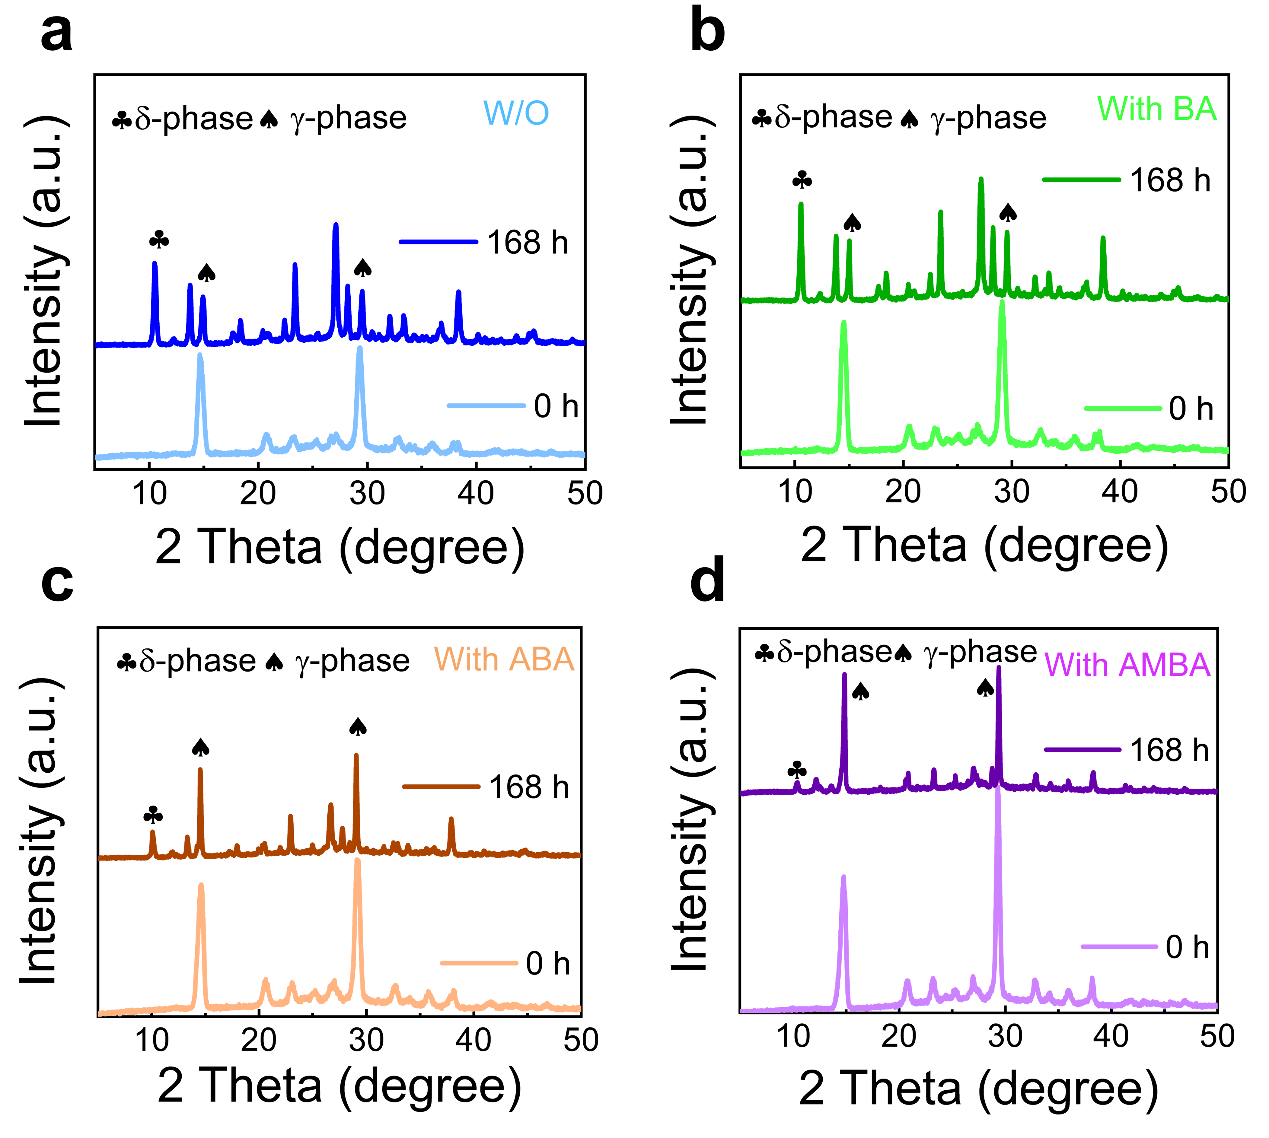


**Fig. S24** XRD results of perovskite layers without and with BSAMs at 0 and 168 h.


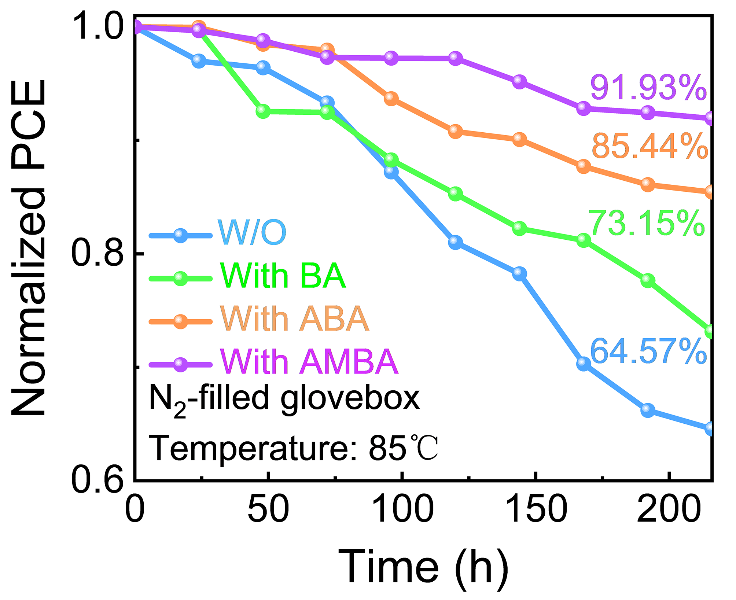


**Fig. S25** The thermal stability of the devices in the N2 environment without and with BSAMs.


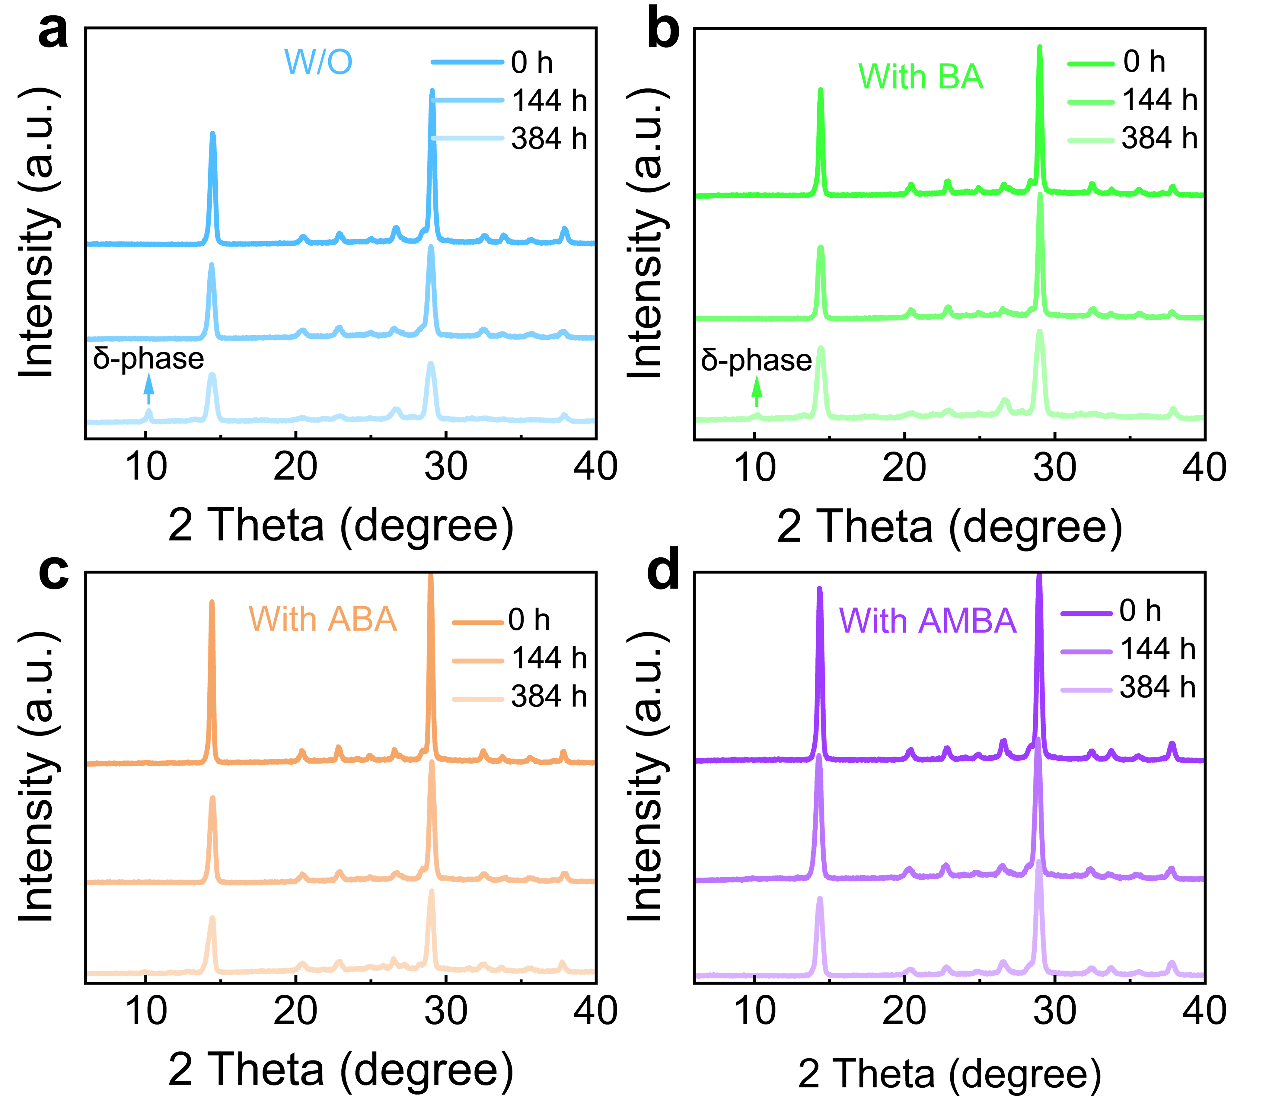


**Fig. S26** XRD results of perovskite layers without and with BSAMs under UVC irradiation for 0 h, 144 h, and 384 h.

**Table S1** The band structure parameters of TiO2, TiO2/BSAMs, and CsPbI3-xBrx films, respectively.

| **Samples** | **Ecutoff**  **(eV)** | **EFermi**  **(eV)** | **EC**  **(eV)** | **EV**  **(eV)** | **WF**  **(eV)** | **Eg**  **(eV)** |
| --- | --- | --- | --- | --- | --- | --- |
| TiO2 | 16.64 | 3.16 | 4.43 | 7.74 | 4.58 | 3.31 |
| TiO2/BA | 16.73 | 3.14 | 4.32 | 7.63 | 4.49 | 3.31 |
| TiO2/ABA | 16.86 | 3.13 | 4.18 | 7.49 | 4.36 | 3.31 |
| TiO2/AMBA | 16.97 | 3.11 | 4.05 | 7.36 | 4.25 | 3.31 |
| CsPbI3-xBrx | 17.08 | 1.54 | 3.95 | 5.68 | 4.14 | 1.73 |

**Table S2** Fitted TRPL parameters of the perovskite films deposited on the TiO2 without and with BSAMs.

| **Samples** | **𝜏ave (ns)** | **𝜏1 (ns)** | **А1** | **𝜏2 (ns)** | **А2** |
| --- | --- | --- | --- | --- | --- |
| W/O | 26.85 | 8.80 | 0.38 | 29.41 | 0.8 |
| With BA | 15.53 | 4.71 | 1.45 | 19.70 | 0.9 |
| With ABA | 7.21 | 3.67 | 3.17 | 15.76 | 0.31 |
| With AMBA | 4.87 | 2.29 | 7.22 | 7.73 | 1.93 |

**Table S3** Fitted EIS parameters of PSCs without and with BSAMs.

| **Samples** | **Rs (Ω)** | **Rrec (Ω)** |
| --- | --- | --- |
| W/O | 58.61 | 74018 |
| With BA | 19.92 | 99340 |
| With ABA | 8.64 | 107820 |
| With AMBA | 2.345 | 174670 |

**Table S4** The photovoltaic parameters of PSCs without and with BSAMs.

| **Samples** | **JSC (mA/cm2)** | **VOC (V)** | **FF (%)** | **PCE (%)** |
| --- | --- | --- | --- | --- |
| W/O | 21.52 | 1.130 | 75.55 | cc |
| With BA | 21.52 | 1.163 | 77.73 | 19.45 |
| With ABA | 21.65 | 1.179 | 78.41 | 20.02 |
| With AMBA | 21.77 | 1.208 | 81.30 | 21.38 |

**Table S5** The photovoltaic parameters of the control and AMBA-based PSCs under different voltage scanning directions.

| **Samples** | **JSC (mA/cm2)** | **VOC (V)** | **FF (%)** | **PCE (%)** | **HI (%)** |
| --- | --- | --- | --- | --- | --- |
| W/O (F) | 21.50 | 1.098 | 72.06 | 17.01 | 7.40 |  |  |
| W/O (R) | 21.52 | 1.130 | 75.55 | 18.37 |
| With AMBA (F) | 21.75 | 1.203 | 79.32 | 20.75 | 2.95 |
| With AMBA (R) | 21.77 | 1.208 | 81.30 | 21.38 |

**Table S6** Summary of stability of CsPbI3-xBrx PSCs under UV irradiation.

| **Configuration** | **Champion PCE (%)** | **Environment** | **Aging time (h)** | **Remaining PCE (%)** | **λ (nm)** | **Ref.** |
| --- | --- | --- | --- | --- | --- | --- |
| FTO/TiO2/CsPbI3-xBrx+MC/Spiro-OMeTAD/Au | 22.04 | Air | 150 | 91.1 | -- | 1 |
| FTO/TiO2/Ti3C2Tx/CsPbI3-xBrx/Spiro-OMeTAD/Ag | 19.56 | Air | 450 | 81 | -- | 2 |
| FTO/TiO2/Cs2PbI2Cl2/CsPbI2Br/Cs2PbI2Cl2/Spiro-OMeTAD/Ag | 16.65 | -- | 200 | 82 | 365 | 3 |
| ITO/SnO2/CsPbI2Br/P3HT/Ag | 16.86 | Air | 28 | 94 | 365 | 4 |
| ITO/NiOx/4-ABSA/CsPb0.6Sn0.4I3-xBrx/Au | 17.4 | N2 | 240 | 80 | 365 | 5 |
| FTO/TiO2/AMBA/CsPbI3-xBrx/Spiro-OMeTAD/Ag | 21.38 | N2 | 384 | 93.80 | 254 | This work |

**References**

1. Zhou, T. et al. Innovative application of photochromic molecules in inorganic perovskite solar cells: simultaneous refinement in performance and environmental sustainability. *Adv. Energy Mater.* **15**, 2404850 (2024).

2. Wang, M. et al. Buried interface modulation via preferential crystallization in all-inorganic perovskite solar cells: the case of multifunctional Ti3C2Tx. *Adv. Funct. Mater.* **33**, 2300700(2023).

3. [Yang](https://advanced.onlinelibrary.wiley.com/authored-by/Yang/Shaomin), S. et al. In situ tin(II) complex antisolvent process featuring simultaneous quasi-core-shell structure and hterojunction for improving efficiency and stability of low-bandgap perovskite solar cells. *Adv. Energy Mater.* **10**, 2002882 (2020).

4. Hu, J. et al. Flattening of the cratered inorganic perovskite film via precursor engineering for CsPbI2Br solar cells with 16.86% efficiency. *ACS Sustainable Chem. Eng.* **12**, 13392-13400 (2024).

5. [Zhang](https://advanced.onlinelibrary.wiley.com/authored-by/Zhang/Weihai), W. et al. Oriented Molecular Dipole-Enabled Modulation of NiOx/Perovskite Interface for Pb-Sn Mixed Inorganic Perovskite Solar Cells, *Adv.Mater.* **37**, 2414125(2025).
